# Supplementary material for: Integrating an early child development intervention into an existing primary healthcare platform in rural Lesotho: a prospective case–control study
Source: PubMed Central journal article supplement — BMJ Open. 2022 Feb 4;12(2):e051781. doi: 10.1136/bmjopen-2021-051781 (PMC8819803; doi:10.1136/bmjopen-2021-051781), 2022-02-04
Supplement: bmjopen-2021-051781.draft_revisions.pdf [file bmjopen-2021-051781.draft_revisions.pdf]

# BMJ Open

BMJ Open is committed to open peer review. As part of this commitment we make the peer review history of every article we publish publicly available.

When an article is published we post the peer reviewers' comments and the authors' responses online. We also post the versions of the paper that were used during peer review. These are the versions that the peer review comments apply to.

The versions of the paper that follow are the versions that were submitted during the peer review process. They are not the versions of record or the final published versions. They should not be cited or distributed as the published version of this manuscript.

BMJ Open is an open access journal and the full, final, typeset and author-corrected version of record of the manuscript is available on our site with no access controls, subscription charges or pay-per-view fees (<http://bmjopen.bmj.com>).

If you have any questions on BMJ Open's open peer review process please email [info.bmjopen@bmj.com](mailto:info.bmjopen@bmj.com)

# BMJ Open

## Improving Child Development and Parenting Skills by Integrating an Early Child Development Intervention into Primary Health Care in Rural Lesotho

|                               |                                                                                                                                                                                                                                                                                                                                                                                                                                                                                                                                                                                                                                                                                                                                                                                                                                                                         |
|-------------------------------|-------------------------------------------------------------------------------------------------------------------------------------------------------------------------------------------------------------------------------------------------------------------------------------------------------------------------------------------------------------------------------------------------------------------------------------------------------------------------------------------------------------------------------------------------------------------------------------------------------------------------------------------------------------------------------------------------------------------------------------------------------------------------------------------------------------------------------------------------------------------------|
| Journal:                      | <i>BMJ Open</i>                                                                                                                                                                                                                                                                                                                                                                                                                                                                                                                                                                                                                                                                                                                                                                                                                                                         |
| Manuscript ID                 | bmjopen-2021-051781                                                                                                                                                                                                                                                                                                                                                                                                                                                                                                                                                                                                                                                                                                                                                                                                                                                     |
| Article Type:                 | Original research                                                                                                                                                                                                                                                                                                                                                                                                                                                                                                                                                                                                                                                                                                                                                                                                                                                       |
| Date Submitted by the Author: | 07-Apr-2021                                                                                                                                                                                                                                                                                                                                                                                                                                                                                                                                                                                                                                                                                                                                                                                                                                                             |
| Complete List of Authors:     | Nelson, Adrienne; Tulane University School of Public Health and Tropical Medicine, Global Community Health and Behavioral Sciences<br>Ndayizigiye, Melino; Partners In Health<br>Whelley, Collin; Partners In Health<br>Lerotholi, Rorisang; Partners In Health<br>Mabathoana, Joalane; Partners In Health<br>Carmona, Merida; Partners In Health<br>Curtain, Joe; Partners In Health<br>Birru, Ermyas; Partners In Health<br>Stulac, Sara; Boston University School of Medicine<br>Miller, Ann; Harvard Medical School, Global Health and Social Medicine<br>Shin, Sonya; Brigham and Women's Hospital, Division of Global Health Equity<br>Rumaldo, Nancy; Socios En Salud Sucursal Peru<br>Mukherjee, Joia; Partners In Health; Harvard Medical School, Global Health and Social Medicine<br>McBain, Ryan; RAND Corporation; Partners In Health, Economic Evaluation |
| Keywords:                     | PAEDIATRICS, Public health < INFECTIOUS DISEASES, International health services < HEALTH SERVICES ADMINISTRATION & MANAGEMENT, HIV & AIDS < INFECTIOUS DISEASES, MENTAL HEALTH, Maternal medicine < OBSTETRICS                                                                                                                                                                                                                                                                                                                                                                                                                                                                                                                                                                                                                                                          |
|                               |                                                                                                                                                                                                                                                                                                                                                                                                                                                                                                                                                                                                                                                                                                                                                                                                                                                                         |

SCHOLARONE™  
Manuscripts

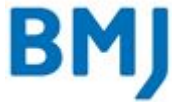

I, the Submitting Author has the right to grant and does grant on behalf of all authors of the Work (as defined in the below author licence), an exclusive licence and/or a non-exclusive licence for contributions from authors who are: i) UK Crown employees; ii) where BMJ has agreed a CC-BY licence shall apply, and/or iii) in accordance with the terms applicable for US Federal Government officers or employees acting as part of their official duties; on a worldwide, perpetual, irrevocable, royalty-free basis to BMJ Publishing Group Ltd ("BMJ") its licensees and where the relevant Journal is co-owned by BMJ to the co-owners of the Journal, to publish the Work in this journal and any other BMJ products and to exploit all rights, as set out in our [licence](#).

The Submitting Author accepts and understands that any supply made under these terms is made by BMJ to the Submitting Author unless you are acting as an employee on behalf of your employer or a postgraduate student of an affiliated institution which is paying any applicable article publishing charge ("APC") for Open Access articles. Where the Submitting Author wishes to make the Work available on an Open Access basis (and intends to pay the relevant APC), the terms of reuse of such Open Access shall be governed by a Creative Commons licence – details of these licences and which [Creative Commons](#) licence will apply to this Work are set out in our licence referred to above.

Other than as permitted in any relevant BMJ Author's Self Archiving Policies, I confirm this Work has not been accepted for publication elsewhere, is not being considered for publication elsewhere and does not duplicate material already published. I confirm all authors consent to publication of this Work and authorise the granting of this licence.

**TITLE**

**Improving Child Development and Parenting Skills by Integrating an Early Child Development Intervention into Primary Health Care in Rural Lesotho**

**AUTHORS**

Nelson, Adrienne Katrina<sup>1</sup>; Ndayizigiye, Melino<sup>2</sup>; Whelley, Collin<sup>3</sup>; Rorisang Lerotholi<sup>2</sup>, Mabathoana, Joalane<sup>2</sup>; Carmona, Merida<sup>3</sup>; Curtain, Joe<sup>3</sup>; Birru, Ermyas<sup>2</sup>; Stulac, Sara<sup>4</sup>; Miller, Ann C.<sup>5</sup>; Shin, Sonya S.<sup>6</sup>; Rumaldo, Nancy<sup>7</sup>; Mukherjee, Joia<sup>3,5</sup>; McBain, Ryan K. <sup>3,8</sup>

*<sup>1</sup>Tulane University School of Public Health and Tropical Medicine, Department of Global Community Health and Behavioral Sciences; <sup>2</sup>Partners In Health, Maseru, Lesotho; <sup>3</sup>Partners In Health, Boston, MA, USA; <sup>4</sup>Boston University School of Medicine, Boston, MA, USA; <sup>5</sup>Harvard Medical School, Department of Global Health and Social Medicine; <sup>6</sup>Brigham and Women's Hospital, Division of Global Health Equity, <sup>7</sup>Socios En Salud, Partners In Health Sucursal Peru, <sup>8</sup>RAND Corporation, Santa Monica, CA, USA.*

**CORRESPONDING AUTHOR**

Adrienne Katrina Nelson  
Tulane University School of Public Health and Tropical Medicine  
Department of Global Community Health and Behavioral Sciences  
1440 Canal St.  
New Orleans, LA 70112  
adrienne.katrina.nelson@gmail.com

## ABSTRACT

**Objectives:** This study evaluated a novel early child development (ECD) program integrated it into the primary healthcare system.

**Setting:** The intervention was implemented in a rural district of Lesotho from 2017-2018.

**Participants:** It targeted primary caregivers during routine post-natal care visits and through village health worker home visits.

**Intervention:** The hybrid care delivery model was adapted from a successful program in Lima, Peru and focused on parent coaching for knowledge about child development, practicing contingent interaction with the child, parent social support and encouragement.

**Primary and secondary outcomes measures:** We compared developmental outcomes and caregiving practices in a cohort of 130 caregiver-infant (ages 7-11 months-old) dyads who received the ECD intervention, to a control group that did not receive the intervention (n=125) using a case-control study design. Developmental outcomes were evaluated using the Extended Ages and Stages Questionnaire (EASQ), and caregiving practices using two measure sets (i.e. UNICEF MICS, Parent Ladder). Group comparisons were made using multivariable regression analyses, adjusting for caregiver-, infant- and household-level demographic characteristics.

**Results:** At completion, children in the intervention group scored meaningfully higher across all EASQ domains, compared to children in the control group: communication ( $\delta=0.21$ , 95%CI: 0.07-0.26), social development ( $\delta=0.27$ , 95%CI: 0.11-28), and motor development ( $\delta=0.33$ , 95%CI: 0.14-0.31). Caregivers in the intervention group also reported significantly higher adjusted odds of engaging in positive caregiving practices in four of six MICS domains, compared to caregivers in the control group—including book reading (AOR: 3.77, 95%CI: 1.94-7.29) and naming/counting (AOR: 2.05; 95%CI: 1.24-3.71).

**Conclusions:** These results suggest that integrating an ECD intervention into a rural primary care platform, such as in the Lesothoan context, may be an effective and efficient way to promote early child development outcomes.

## ARTICLE SUMMARY

### *Strengths and limitations of this study*

- This study shows that strong findings from a community-based early child development intervention developed for a culturally distinct resource-limited setting had sustained impact when adapted for hybrid clinic/community delivery in a rural African setting.
- This impact extends beyond ECD outcomes to caregiver engagement and caregiver/child interaction.
- Newborns and very young infants benefitted equally to older children, showing these interventions should start early.
- The use of an extended version of the Ages and Stages Questionnaire facilitated uptake but could introduce bias as it is a parent report tool.
- We were unable to include patients in dissemination activities and in the future would extend patient involvement even further.

## INTRODUCTION

The period from prenatal development to three years of age is one of the most critical stages of brain development [1]. Malnutrition and stunting [2, 3] threaten to deny an estimated 250 million children under five (43%) with the opportunity to reach their full developmental potential [4]. Social forces common in lower and middle income countries (LMICs), such as violence, abuse and neglect trigger the body's stress response system that can remain chronically activated into adulthood, straining the cardiovascular and central nervous systems [5, 6]. The impact of the culmination of these forces may be irreversible and contribute to a cycle of poverty, inequality, and social exclusion [7, 8]. Caregivers have the unique opportunity to engage in positive interactions with their children beginning at a very young age, which have been proven to nourish and even reverse this damage [9-11].

For this reason, attention has been given to finetuning strategies to reach children living in poverty in LMICs through early childhood development (ECD) programs [12-14]. Many such programs have improved ECD, caregiver behavior, and school readiness, however, particularly in rural LMICs, they are primarily facility or center-based

1  
2  
3 interventions, where caregivers deliver their child to a trained professional for stimulation  
4  
5 activities [15].  
6

7  
8 While integrated facility-community interventions are rapidly becoming the norm,  
9  
10 facility-based studies such as that by Chang and colleagues' (2015) caregiving intervention in  
11  
12 Jamaica demonstrate that facility-based programs are effective in promoting cognitive  
13  
14 development for children up to 18 months old [16]. This approach has the benefit of  
15  
16 facilitating training and delivery for practitioners, but there may be shortcomings in terms of  
17  
18 scale up and sustainability. Health facilities in rural low-resource settings are routinely  
19  
20 overwhelmed by the volume of patients presenting with physical health conditions and ECD  
21  
22 screening is sidelined. Caregivers of physically healthy children may have little incentive to  
23  
24 attend health clinics located long distances from their home and therefore participation may  
25  
26 be low. Caregivers in Lesotho, for instance, walk up to 10 hours each way to reach a health  
27  
28 center. The salary for a mental health professional in a clinical setting can be prohibitive  
29  
30 when hospitals manage tight budgets and urgently needed health supplies and physicians may  
31  
32 be prioritized. Home- and community-based programs benefit from the low-cost of a  
33  
34 community workforce [17]. Likewise, in home or community -based visitation programs, the  
35  
36 family can participate. The family environment is widely accepted as a central focus for  
37  
38 intervention, including social support and/or self-esteem building of the caregivers [18].  
39  
40 Community workers are experts in local knowledge and the can be allies in adaptation of  
41  
42 curricula to local contexts, an area of ECD interventions in LMICs that is receiving  
43  
44 increasing attention from ECD scholars [19].  
45  
46  
47  
48  
49

50  
51 For this study, the team in Lesotho developed a hybrid community/clinic-based ECD  
52  
53 intervention adapted from two ECD interventions which have shown impact in other rural  
54  
55 LMICs. Village health workers (VHWs) delivered the home-based intervention as part of  
56  
57 their routine activities, while leveraging post-natal care visits—during which caregivers are  
58  
59  
60

1  
2  
3 already attending primary care facilities with their children for immunizations—for  
4  
5 enrollment and ECD intervention initiation [20].  
6  
7

8 This pilot study evaluates the impact of this hybrid delivery model on ECD outcomes  
9  
10 and caregiving practices by comparing a cohort of caregiver-infant (7-11 month-old) dyads  
11  
12 who received the intervention, to a comparable cohort that did not receive the intervention.  
13  
14 We hypothesized that the delivery model would successfully engage parent-child dyads, and  
15  
16 that the intervention would increase developmentally-supportive parenting practices in turn  
17  
18 improving developmental outcomes.  
19  
20  
21  
22

## 23 **MATERIALS AND METHODS**

### 24 ***Study Setting***

25  
26 This study took place within the catchment area of Nkau Health Center in the district  
27  
28 of Mohale's Hoek District, Lesotho. Nkau Health Center is a rural, mountainous clinic in  
29  
30 Lesotho southwestern region, with an estimated catchment population of 15,000 persons as of  
31  
32 2016 (Lesotho Ministry of Health and ICF International, 2016). The health center is a public  
33  
34 government facility supported by the medical NGO Partners In Health. Two types of VHWs  
35  
36 are integrated into primary healthcare teams across all villages in the catchment area, with  
37  
38 one VHW cadre focused on HIV and TB, and the other focused on maternal and child health.  
39  
40  
41  
42  
43  
44  
45  
46

### 47 ***Intervention***

48  
49 This program was developed from an existing program called CASITA which showed  
50  
51 positive impact at scale in rural LMIC settings [21]. A community-based ECD intervention in  
52  
53 Carabayllo, a low-resource community outside of Lima, Peru, CASITA was developed by  
54  
55 our sister organization Socios En Salud (Partners In Health Succursal Peru) and is now  
56  
57 scaling up to over 3,455 children. CASITA, adapted for use from the SPARK Center's ECD  
58  
59  
60



1  
2  
3 program for children living in poverty at Boston Medical Center, involves four featured  
4  
5 components of ECD training sessions: 1) knowledge sharing about child development and  
6  
7 child observation; 2) demonstration and initiation of social interaction activities tailored to  
8  
9 the child's development; 3) caregiver encouragement on caregiving behavior and  
10  
11 development interactions; and 4) caregiver social support and reassurance. In the pilot study,  
12  
13 children ages 6-24 months who screened at risk of delay received either individual home-  
14  
15 visits or group sessions with this curriculum, along with nutritional supplements. Those in the  
16  
17 intervention group improved ECD significantly compared to the control group in all areas of  
18  
19 delay [14]. Caregivers and community health representatives widely agreed that individual  
20  
21 home visits and group gatherings in local community centers outside of the clinic was central  
22  
23 to its success [14]. We borrowed the curricula and session structure and spacing from  
24  
25 CASITA.  
26  
27  
28  
29  
30  
31  
32

### 33 ***Patient and Public Involvement***

34  
35 During adaptation, each aspect of the curricula was reviewed with the CASITA  
36  
37 researcher (AKN) and the ECD Nurse (RL) at the village health center were conducted in  
38  
39 May 2017. Draft adaptations were noted on all curricula materials and then discussed with  
40  
41 one VHW and one local mother. Final changes were made on consensus with the on-site  
42  
43 Principal Investigator (MN) and Maternal and Child Health Program Manager (JM). Two to  
44  
45 three patients were involved in the adaptation of the intervention. Women received the  
46  
47 intervention in a draft phase and were asked about their reactions. Opinions were  
48  
49 incorporated into the intervention design. Care was taken to consider local childrearing  
50  
51 practices, of particular importance given increased concern about the cultural relevance of  
52  
53 ECD interventions being transposed to LMICs from other contexts [19]. Findings from this  
54  
55 study will not be formally shared with study participants, however, health professionals at the  
56  
57  
58  
59  
60

1  
2  
3 clinic will be presented with the findings through a staff meeting and may respond to patients  
4  
5 questions during clinical visits.  
6  
7  
8  
9

### 10 ***Study design***

11  
12 This is a prospective case control pilot study to test the impact of an early intervention  
13  
14 with a hybrid delivery model on 1) improved ECD outcomes, 2) caregiver-child interaction,  
15  
16 and 3) developmentally-supportive caregiving practices. The latter two were chosen as they  
17  
18 have been shown to be mediators between ECD interventions focused on parent coaching and  
19  
20 ECD outcomes.  
21  
22

23  
24 Recruitment for the control and intervention groups started in May and July 2017,  
25  
26 respectively. For the intervention group, dyads with children ages 0-6 weeks receiving  
27  
28 postnatal care (PNC) services at health clinics in Mohale's Hoek were recruited and offered  
29  
30 enrollment in the intervention. Children who were born more than two weeks prematurely  
31  
32 and with severe developmental delays were excluded.  
33  
34

35  
36 As a control comparison, we identified a cohort of caregiver-infant dyads residing in  
37  
38 the same catchment area, among whom infants were already 7-11 months old and therefore  
39  
40 not eligible for the intervention. Comparison dyads were assessed with the same set of  
41  
42 measures as the intervention group, solely during the intervention group's baseline period. As  
43  
44 such, the comparison of interest was between the intervention group at end line (when infants  
45  
46 were 7-11 months old) versus the control group at baseline (when infants were 7-11 months  
47  
48 old). The comparisons were adjusted using all demographic information and covariates.  
49  
50  
51  
52

### 53 ***Study Sample***

54  
55 259 dyads were screened. Of these 259 dyads, 255 were enrolled: 125 dyads in the  
56  
57 control group and 130 dyads in the intervention group were included. No families refused  
58  
59  
60

1  
2  
3 participation. Three children were born prematurely and one child was found to have mild to  
4  
5 severe developmental delays and thus, were excluded from the sample. At the point of  
6  
7 analysis within the intervention group, nine dyads withdrew from the study, two were  
8  
9 deceased, and one of a set of twins was removed from analysis to prevent bias occurring from  
10  
11 including multiple children within a single household [Figure 1].  
12  
13  
14  
15  
16

17 All dyads in the intervention group were invited to participate in seven caregiver  
18  
19 education sessions. Sessions at weeks 6, 10, 14, and 18 took place at Nkau Health Center and  
20  
21 were conducted by a trained ECD nurse in a group setting. These dates corresponded to  
22  
23 Lesotho's national immunization schedule, so families did not have to travel to the clinic for  
24  
25 additional visits. Caregivers who either couldn't make group sessions due to scheduling or  
26  
27 missed sessions were targeted for individual outreach by VHWs. Of the 119 participating  
28  
29 dyads, 100% completed sessions at 6, 10, and 14 weeks, and 83 (70%) completed the final  
30  
31 session at 18 weeks. The remaining three sessions (8, 12 and 16 weeks) were conducted by  
32  
33 maternal health VHWs in dyads' households. Of those, 88 (74%) completed the 8 week  
34  
35 session, 75 (63%) completed the 12 week session, and 85 (71%) completed the 16 week  
36  
37 session. VHWs were charged with leading these sessions as they work primarily in the  
38  
39 community, whereas ECD nurses are based in the clinic. The ECD nurse conducted  
40  
41 unannounced spot checks of VHWs to ensure they were conducting the intervention as  
42  
43 intended. After the seven sessions were completed, VHWs continued to conduct regular  
44  
45 home visits focused on maternal and child health.  
46  
47  
48  
49

50  
51 There were two deviations from the original program design that should be noted: while  
52  
53 the intervention was based on group sessions at health centers, flooding and scheduling  
54  
55 challenges within villages required unanticipated one-on-one sessions by VHWs. Caregivers  
56  
57  
58  
59  
60

1  
2  
3 who missed sessions required targeted outreach, including additional VHW visitations to  
4 homes to ensure all caregivers received the complete intervention.  
5  
6  
7  
8  
9

### 10 ***Training***

11  
12 One researcher involved in creating and piloting CASITA traveled to Lesotho and  
13 trained 80 VHWs together with the head ECD nurse, who in turn coached caregivers while  
14 modeling positive caregiving behaviors. Training took place at the Nkau Health Center over  
15 three days and all VHWs traveled to the clinic to attend. Training involved lecture-style  
16 sessions in English with video examples of key concepts, translated into Sesotho, didactic  
17 small-group discussions, and practice with individualized feedback. Refresher trainings for  
18 the Village Health Workers were conducted on monthly basis during the VHWs monthly  
19 meetings at the clinics.  
20  
21  
22  
23  
24  
25  
26  
27  
28  
29  
30  
31  
32

### 33 ***Measures***

34  
35 *ECD Measures.* ECD was assessed using the Extended Ages and Stages Questionnaire  
36 (EASQ), an adapted version of the Ages and Stages Questionnaire (ASQ) [22], with the same  
37 questions presented in continuous format, allowing for pre- and post- score comparison  
38 across ages [14, 23]. The ASQ is widely used internationally and screens for developmental  
39 risk with three domains: communication (e.g. “If you repeat the sounds your baby makes,  
40 does s/he repeat them again after you?”), social/personal development (e.g. “When you reach  
41 out your hand to ask for a toy, does baby hand it to you?”), and motor development (e.g.  
42 “When your baby is lying face down, can he stretch his arms and lift his chest off the bed or  
43 floor?”). Response options are yes, sometimes, and no. A few words on the EASQ were  
44 changed for applicability in Sesotho. For instance, on the 4-6 Month item #25.7.10 which  
45  
46  
47  
48  
49  
50  
51  
52  
53  
54  
55  
56  
57  
58  
59  
60

1  
2  
3 reads, “Does your baby make rounds like “ma,” “da,” “ga,” “ca” and “ba”? “, the team  
4 removed “ga” and “ca” and added “aaa” and “na” to mimick early sounds in Sesotho.  
5  
6  
7  
8  
9

10 *Caregiver Measures.* Caregiver engagement was measured using the self-report  
11 Parent Ladder [24], an omnibus measure of caregiver engagement designed to measure  
12 knowledge, skills and behavior. This scale contains 12 items on a seven-point ordinal scale  
13 ranging from 0 (lowest) to 6 (highest) with questions such as “Knowledge of how my child is  
14 growing and developing?” and “Ability to identify my child’s needs?”. The global score was  
15 used to measure caregiver engagement. Second, six questions from UNICEF’s Multiple  
16 Indicator Cluster Survey: for Children Under Five [25] were selected to measure in-home  
17 caregiver-child interaction. Questions contain four multiple-response options (“mother”,  
18 “father”, “other”, “no one”), and questions such as: “In the past 3 days, did you or any  
19 household member engage in any of the following activities with your baby: (1) Read books  
20 or looked at a picture books with baby?” and “(2) ...sang songs to baby, including  
21 lullabies?”.  
22  
23  
24  
25  
26  
27  
28  
29  
30  
31  
32  
33  
34  
35  
36

37 All measures were translated into Sesotho by a certified translator and checked with  
38 the ECD nurse fluent in English, then double-checked with the site PI and MCH program  
39 manager to ensure meaning was correct. All questions regarding meaning were discussed  
40 with a Boston-based ECD researcher.  
41  
42  
43  
44  
45  
46

47 Caregiver socioeconomic status was measured by educational attainment and  
48 household assets. Depressive symptoms were measured using the PHQ-9 [26]. Other  
49 covariates such as sex, age, height/length, and weight, were recorded for each child at every  
50 data collection point.  
51  
52  
53  
54  
55  
56  
57

### 58 *Statistical Analysis*

59  
60

1  
2  
3 It was determined that 250 participants must be enrolled in order to detect statistical  
4 significance of  $\alpha = .05$  with a power of .80 for the primary outcome variables. As a  
5 preliminary review of the data, correlations between the outcome variables and covariates  
6 were inspected using Pearson coefficients. Bivariate analyses then examined individual  
7 relationships between independent variables (see above) and outcomes of interest. Based on  
8 these preliminary analyses, we identified a consistent pattern of expected associations,  
9 indicating acceptable concurrent validity, and did not identify any correlations that were so  
10 strong ( $r > 0.70$ ) they may be indicative of collinearity in statistical models.  
11  
12  
13  
14  
15  
16  
17  
18  
19  
20  
21

22 Following preliminary review, the intervention and control groups were compared  
23 using univariate and multivariable regression analysis: multivariable linear regression for  
24 continuous outcomes such as child EASQ scores, and multivariable logistic regression for  
25 binary outcomes, such as caregiving behaviors, documented in the MICS survey. These  
26 comparisons examined child development outcomes and caregiving outcomes between  
27 groups, adjusting for covariates in order to safeguard against omitted variable bias. Analyses  
28 Used STATA's xtreg command to account for autocorrelation and clustering of multiple data  
29 points within individuals over time (StataCorp, 2017).  
30  
31  
32  
33  
34  
35  
36  
37  
38  
39

40 EASQ analysis was stratified by the test age group (7-9 month vs. 10-11 month), and  
41 then merged with a dummy variable to represent test type. To ensure appropriateness of  
42 intervention and control group comparisons, dyads were compared when infants were within  
43 the same age group: namely, 7-11 months old.  
44  
45  
46  
47  
48  
49  
50

## 51 RESULTS

52 The control and intervention groups were similar across most demographic  
53 characteristics, including immunization completion rates and percentage of facility-based  
54 deliveries. Caregivers in the intervention were slightly more educated and younger, and  
55  
56  
57  
58  
59  
60

1  
2  
3 scored modestly higher on the PHQ-9 depression score at endline, as well as reporting more  
4 frequent antenatal care visits. Children of caregivers in the intervention group were slightly  
5 younger and had lower anthropomorphic z-scores. Table 1 contains detailed demographic  
6 indicators. All covariates were incorporated in final multivariable regression models,  
7 regardless of statistical significance, as we determined relevance of covariates a priori based  
8 on evidence in child development literature. Of the 119 participating dyads, 100% completed  
9 all sessions until 14 weeks, and 83 (70%) completed the final session. All those completing  
10 14 sessions were included in final analysis, with the exception of one twin who was removed  
11 to prevent family bias. In the end, 243 participants had final outcome data.  
12  
13  
14  
15  
16  
17  
18  
19  
20  
21  
22  
23  
24  
25

26 **[Insert Table 1]**

### 27 *Early Child Development Outcomes*

28  
29  
30 Adjusting for covariates, at endline, children in the intervention group scored higher  
31 on EASQ measures across all domains: total score, communication, social, and motor  
32 development. Moreover, these results were consistent regardless of whether the age range  
33 was restricted to 7-9 months at endline, 10-11 months at endline, or pooled, with the one  
34 exception being communication in the 7-9 month group, for which the intervention group  
35 observed non-significantly higher scores ( $p=0.08$ ). An overview of results, measured in terms  
36 of standard deviation (SD) improvements from baseline to endline, is presented in Table 2.  
37  
38  
39  
40  
41  
42  
43  
44  
45  
46  
47  
48

49 **[Insert Table 2]**

### 50 *Caregiver Outcomes*

51  
52  
53  
54 Results also indicated marked improvement on the Parent Ladder in the intervention  
55 group compared to the control group. Caregivers in the intervention group were 17 points  
56  
57  
58  
59  
60

1  
2  
3 higher at endline (44%), compared to the control group ( $\delta=1.57$ ,  $p<0.001$ ). Differences  
4  
5 remained significant ( $\delta=0.56$ ,  $p<0.05$ ) after adjusting for covariates in the context of  
6  
7 multivariate regression.  
8  
9

10 Similarly, the intervention was associated with greater odds of affirmative responses  
11  
12 on all but one MICS items (Table 3). MICS results suggested that caregivers in the  
13  
14 intervention group were: 3.7 times more likely to read a book to their child in the past three  
15  
16 days, 13.8 times more likely to tell stories, 2.3 times more likely to sing songs, 2.8 times  
17  
18 more likely to engage in play, and 2.1 times more likely to name, count, or draw with their  
19  
20 child.  
21  
22  
23  
24  
25

26 **[Insert Table 3]**  
27  
28

## 29 **DISCUSSION**

30  
31 We implemented an early childhood development intervention in the Nkau Health  
32  
33 Center catchment area of Mohale's Hoek, Lesotho, one of the more rural, remote regions of  
34  
35 the country. A total of 130 dyads were enrolled in the intervention over a 6-month period,  
36  
37 representing the vast majority of new mothers (>90%) attending clinic. As such, our findings  
38  
39 suggest acceptability and feasibility for broad implementation in similar rural settings,  
40  
41 including other districts of Lesotho. More importantly, the intervention indicated marked  
42  
43 positive impacts on both children and caregivers enrolled.  
44  
45  
46  
47

48 Children whose caregivers participated in the ECD intervention observed significantly  
49  
50 greater improvements in all developmental domains compared to a control group of the same  
51  
52 age range. Associated effect sizes were also clinically meaningful—particularly in the older  
53  
54 age range of 9-11 month-old infants, where group standardized mean differences ranged from  
55  
56 0.30 to 0.50 after adjusting for covariates. We found that caregivers in the intervention group  
57  
58 significantly improved their caregiving skills, knowledge and confidence, relative to those in  
59  
60



1  
2  
3 the control group and were more likely engage in interactions with children following receipt  
4 of the intervention.  
5  
6

7  
8 While several studies have shown ECD improvements through caregiver interventions  
9 [27-29], most interventions in LMICs have targeted children older than one year [30]. One  
10 study, conducted in another rural region of Lesotho still underway, is engaging children ages  
11 1-5 and their caregivers in eight sessions that included HIV and nutritional education and an  
12 ECD component involving book sharing to encourage caregiver-child engagement [31].  
13 Likewise, a community-based caregiver intervention by Singla and colleagues (2015) in  
14 Uganda resulted in cognitive improvements among children aged 12-36 months [32].  
15 Evidence from high-resource settings indicates that ECD interventions targeted at this first  
16 year of child development may be particularly beneficial [11, 33], as the impacts on  
17 caregiving behaviors and developmental outcomes are likely to carry forward over the course  
18 of childhood. Our study shows this may also true in settings of poverty within LMICs.  
19  
20  
21  
22  
23  
24  
25  
26  
27  
28  
29  
30  
31  
32

33 Our study employed a strategic hybrid delivery model. As such, integrating ECD  
34 interventions into postnatal care services, as modeled in our study, offers a convenient way  
35 for caregivers to learn about cognitive development and child stimulation techniques while  
36 already in attendance at clinics, at a very early stage in the child's life. Lessons provided at  
37 clinics can then be reinforced through VHWs who are operating in community-based  
38 settings, further reducing the onus that might otherwise be placed on caregivers to attend  
39 educational sessions. Several new studies are enrolling participants using a similar integrated  
40 model in other LMICs such as Bangladesh [12].  
41  
42  
43  
44  
45  
46  
47  
48  
49  
50

51 Even still, ECD interventions in low-resource settings may be forgone because scarce  
52 resources limit government capacity to equip health facilities and train health care workers  
53 [34, 35]. These tradeoffs are inherent in many budgetary decisions, where maternal and child  
54 health are underfunded relative to other clinical care domains [36, 37]. Furthermore, rural  
55  
56  
57  
58  
59  
60

1  
2  
3 communities often lack information provided through the internet and other e-learning  
4  
5 platforms that might otherwise educate physicians, healthcare professionals and caregivers on  
6  
7 how to encourage children's cognitive and physical development [38, 39]. In such context,  
8  
9 enhanced caregiver knowledge through ECD interventions based in the community may be  
10  
11 introduced at low cost by building off of existing primary health care infrastructure. The  
12  
13 framework outlined in this study offers a successful illustration of this.  
14  
15

16  
17 A few study limitations should be mentioned. There is a potential for unmeasured  
18  
19 differences between the intervention and control groups, which could account for some level  
20  
21 of difference in ECD outcomes. We attempted to mitigate this possibility by gathering a wide  
22  
23 range of covariates. Likewise, magnitude of the observed impact of the intervention was  
24  
25 sizable, making a Type 1 error relatively unlikely.  
26  
27

28  
29 A third consideration is participant response bias. Measures were dependent on self-  
30  
31 reports of caregivers and repeated administration of tests. It is possible, for example, that  
32  
33 those in the intervention group believed survey administrators wanted to hear that caregiving  
34  
35 behavior and ECD outcomes improved over time. This could overestimate the impact of the  
36  
37 intervention on ECD. The fact that this intervention was adapted from a mixed urban and  
38  
39 rural setting in Peru may suggest the external validity of the program. However, its use in  
40  
41 other African settings would depend on the similarity of the culture and setting and the  
42  
43 careful adaptation of the content.  
44  
45

46  
47 Further research calls on qualitative data such as focus groups to understand what aspects  
48  
49 of the intervention were useful and how the caregivers believed their practices changed in  
50  
51 response to the sessions.  
52  
53

## 54 55 **CONCLUSIONS**

56  
57 This study demonstrated significant effects of an ECD intervention on early child  
58  
59 development, as well as caregiver knowledge and skills. The intervention was implemented  
60

1  
2  
3 with few resources by leveraging existing human resources and health system infrastructure.

4  
5 Based on this, we are hopeful to scale the intervention more broadly in districts throughout  
6  
7  
8 rural Lesotho.  
9  
10  
11  
12  
13  
14  
15  
16  
17  
18  
19  
20  
21  
22  
23  
24  
25  
26  
27  
28  
29  
30  
31  
32  
33  
34  
35  
36  
37  
38  
39  
40  
41  
42  
43  
44  
45  
46  
47  
48  
49  
50  
51  
52  
53  
54  
55  
56  
57  
58  
59  
60

For peer review only

**Table 1: Baseline Characteristics of Intervention and Control Groups**

| Demographic Measures: Binary     | Control Group<br>N (%) | Intervention Group<br>N (%) |
|----------------------------------|------------------------|-----------------------------|
| Caregiver                        |                        |                             |
| Female                           | 124 (99%)              | 117 (99%)                   |
| Primary school complete          | 71 (57%)               | 84 (71%)*                   |
| Birth at home                    | 10 (8%)                | 13 (11%)                    |
| Infant                           |                        |                             |
| Female                           | 73 (58%)               | 65 (55%)                    |
| Evidence of wasting              | 14 (11%)               | 22 (18%)*                   |
| Evidence of stunting             | 5 (4%)                 | 6 (5%)                      |
| Underweight                      | 7 (6%)                 | 10 (8%)*                    |
| Fully Immunized at 9 months      | 125 (100%)             | 112 (95%)                   |
| Demographic Measures: Continuous | Mean (SD)              | Mean (SD)                   |
| Caregiver                        |                        |                             |
| Age (years)                      | 26.01 (7.18)           | 23.50 (6.32)*               |
| Parity                           | 2.18 (1.56)            | 2.06 (1.50)                 |
| Gravida                          | 2.27 (1.64)            | 2.21 (1.68)                 |
| Pregnancy weeks at birth         | 38.82 (1.72)           | 38.79 (1.50)                |
| ANC visits                       | 3.03 (1.16)            | 3.35 (1.04)*                |
| Household members                | 5.92 (2.12)            | 5.75 (2.19)                 |
| Depression score                 | 2.98 (3.08)            | 5.18 (5.18)*                |
| Infant                           |                        |                             |
| Age (months)                     | 9.40 (0.32)            | 9.30 (0.31)*                |
| Weight for height                | -0.44 (1.45)           | -1.03 (1.22)*               |
| Length for age                   | 0.75 (2.08)            | 0.69 (1.63)*                |
| Weight for age                   | 0.12 (1.22)            | -0.60 (1.02)*               |

\* Difference between control and intervention groups  $p < .05$

**Table 2: Early Child Development Outcomes on EASQ – Difference by Group**

| EASQ Category             | Mean Difference | 95% CI      | Standardized Coefficient | 95% CI       | Adj R <sup>2</sup> | Obs. |
|---------------------------|-----------------|-------------|--------------------------|--------------|--------------------|------|
| <b>Communication</b>      |                 |             |                          |              |                    |      |
| EASQ 7-9 month            | 0.11            | 0.03 - 0.18 | 0.09                     | -0.03 - 0.14 | 0.08               | 184  |
| EASQ 10-11 month          | 0.50*           | 0.23 - 0.76 | 0.34*                    | 0.14 - 0.62  | 0.41               | 59   |
| Combined                  | 0.27*           | 0.00 - 0.18 | 0.21*                    | 0.07 - 0.26  | 0.22               | 243  |
| <b>Social Development</b> |                 |             |                          |              |                    |      |
| EASQ 7-9 month            | 0.11*           | 0.03 - 0.19 | 0.15*                    | 0.01 - 0.17  | 0.07               | 184  |
| EASQ 10-11 month          | 0.49*           | 0.26 - 0.73 | 0.42*                    | 0.20 - 0.63  | 0.42               | 59   |
| Combined                  | 0.27*           | 0.19 - 0.36 | 0.27*                    | 0.11 - 0.28  | 0.26               | 243  |
| <b>Motor Development</b>  |                 |             |                          |              |                    |      |
| EASQ 7-9 month            | 0.14*           | 0.07 - 0.21 | 0.26*                    | 0.07 - 0.24  | 0.05               | 184  |
| EASQ 10-11 month          | 0.46*           | 0.20 - 0.71 | 0.46*                    | 0.23 - 0.75  | 0.19               | 59   |
| Combined                  | 0.22*           | 0.16 - 0.32 | 0.33*                    | 0.14 - 0.31  | 0.12               | 243  |
| <b>Total Score</b>        |                 |             |                          |              |                    |      |
| EASQ 7-9 month            | 0.12*           | 0.06 - 0.18 | 0.21*                    | 0.03 - 0.17  | 0.06               | 184  |
| EASQ 10-11 month          | 0.48*           | 0.30 - 0.66 | 0.51*                    | 0.26 - 0.60  | 0.48               | 59   |
| Combined                  | 0.24*           | 0.20 - 0.33 | 0.32*                    | 0.13 - 0.27  | 0.26               | 243  |

Notes: \* $p < 0.05$ . Adjusted multivariable regression included child sex and age, as well as caregiver education, socioeconomic status, and fixed effects for research staff members conducting the assessment. "95% CI stands for 95% Confidence Interval.

**Table 3. Caregiver Engagement – Difference by Group**

| MICS Measure    | Adj. OR | 95% CI       | Pseudo R <sup>2</sup> |
|-----------------|---------|--------------|-----------------------|
| Read book       | 3.77*   | 1.94 - 7.29  | 0.14                  |
| Told stories    | 13.75*  | 6.32 – 29.90 | 0.27                  |
| Sang songs      | 2.29 *  | 1.09 - 4.83  | 0.08                  |
| Took outside    | 1.49    | 0.76 – 2.90  | 0.05                  |
| Actively played | 2.83    | 0.86 - 9.21  | 0.12                  |
| Named/counted   | 2.05*   | 1.24 - 3.71  | 0.07                  |

Notes: \* $p < 0.05$ . Adjusted multivariable regression included child sex and age, as well as caregiver education, socioeconomic status, and fixed effects for research staff members conducting the assessment. “Adj. OR” stands for “Adjusted Odds Ratio” and “95% CI” stands for “95% Confidence Interval of the Adjusted Odds Ratio”.

1  
2  
3 **Figure 1. Study Flow Diagram**  
4

5 **Notes:** The control group comprised caregiver-infant dyads in which infants were 7-11 months-old in May-July  
6 2017, the recruitment period. Caregiver-infant dyads in the control group were assessed immediately upon study  
7 enrolment only. The intervention group comprised caregiver-infant dyads in which infants were 0-2 months in  
8 May-July 2017. Caregiver-infant dyads in the intervention group were assessed three times (baseline, midterm,  
9 final assessment), with baseline assessment conducted immediately upon study enrollment and final assessment  
10 conducted seven months later, when infants were 7-11 months-old.  
11  
12  
13  
14  
15  
16  
17  
18  
19  
20  
21  
22  
23  
24  
25  
26  
27  
28  
29  
30  
31  
32  
33  
34  
35  
36  
37  
38  
39  
40  
41  
42  
43  
44  
45  
46  
47  
48  
49  
50  
51  
52  
53  
54  
55  
56  
57  
58  
59  
60

For peer review only

### ***Contributorship statement***

All authors reviewed manuscript drafts and consented to the final submitted version.

**Adrienne Katrina Nelson**, Principal Investigator of the pilot CASITA study, facilitated intervention and measurement tool translation and adaptation for this study. She traveled to Lesotho to train MJ, the study coordinator, and the village health workers in the intervention. She co-wrote the manuscript and was in charge of submission and correspondence.

**Melino Ndayizigiye** is the Principal Investigator for this study. He is responsible for writing the grant, securing funding, representing the study at international conferences, and interfacing with the ethics committee and US-based investigators. He oversaw on-site study activities and managed Lesotho site staff.

**Collin Whelley** conducted all data management and analysis with the help of AM.

**Rorisang Lerotholi**, the study coordinator, reviewed translated assessment and intervention materials, translated during village health worker trainings, consulted on adaptations, conducted fidelity checks on interventions, and collected data for analysis.

**Joalane Mabathoana**, the then Maternal and Child Health Program Manager at Partners In Health, Lesotho managed the study coordinator and participated in adaptation of materials and training of village health workers.

**Carmona, Merida**, was in charge of donor compliance and study design.

**Curtain, Joe** developed the study design with Ms. Carmona.

**Birru, Ermyas** developed data collection instruments, consulted on data components of the study design, analysis and review of the manuscript.

**Sara Stulac** is a pediatrician and co-investigator on this grant with experience working in Lesotho. She delivered expertise in the field of early child development and pediatrics.

**Ann C. Miller** is the epidemiologist responsible for data analysis for the CASITA project. She provided analytical for this study guidance to CW, specifically for the EASQ, including coding for score standardization.

**Sonya S. Shin** is the senior researcher for the CASITA project and provided high level mentorship to AKN in the adaptation of the study intervention and training of village health workers.

**Nancy Rumaldo** is the site leader of the CASITA project and provided field-level consultation during the adaptation and training in Lesotho.

**Mukherjee, Joia** was the senior clinician in charge of overseeing the clinical components of the study.



1  
2  
3 **McBain, Ryan K.** is the US-based study lead who joined in the analysis phase. He was in  
4 charge of coordinating co-investigators, supervising data analysis, and co-writing the  
5 manuscript.  
6

7  
8 ***Competing interests***  
9

10 Authors report no competing interests.  
11

12 ***Funding***  
13

14 This study was funded by Grand Challenges Canada's Saving Brains grant # SB-1707-09146.  
15  
16

17 ***Data sharing statement***  
18

19 Extra data is available by emailing Collin Whelley at [collinwhelley@gmail.com](mailto:collinwhelley@gmail.com)  
20  
21

22 ***Ethics statement***  
23

24 The study was reviewed and approved by the Lesotho National Ethics Committee approval  
25 reference #ID51-2017.  
26  
27  
28  
29  
30  
31  
32  
33  
34  
35  
36  
37  
38  
39  
40  
41  
42  
43  
44  
45  
46  
47  
48  
49  
50  
51  
52  
53  
54  
55  
56  
57  
58  
59  
60

## References

1. Paterson Sea: **Brain matter matters: Should we intervene well before preschool?** In. Washington DC: Brookings Institution; 2017.
2. Duncan GJ, Brooks-Gunn, J. and Klebanov, P. K.: **Economic Deprivation and Early Childhood Development.** *Child Development* 1994, **65**(2):296–318.
3. Onis MdaB, F.: **Childhood stunting: a global perspective.** *Maternal & Child Nutrition* 2016, **12**:12–26.
4. Black MM, Walker, S.P., Fernald, L.C.H., Andersen, C.T., DiGirolamo, A.M., Lu, C., McCoy, D.C., Fink, G., Shawar, Y.R., Shiffman, J., Devercelli, A.E., Wodon, Q.T., Vargas-Barón, E., Grantham-McGregor, S., Lancet Early Childhood Development Series Steering Committee: **Early childhood development coming of age: science through the life course.** *Lancet* 2017, **389**(10064):77-90.
5. Blair C, Raver, C.C., Granger, D., Mills-Koonce, R., Hibel, L., Family Life Project Key Investigators: **Allostasis and allostatic load in the context of poverty in early childhood.** *Dev Psychopathol* 2011, **23**(3):845-857.
6. Park C, Rosenblat, J.D., Brietzke, E., Pan, Z., Lee, Y., Cao, B., Zuckerman, H., Kalantarova, A., McIntyre, R.S.: **Stress, epigenetics and depression: A systematic review.** *Neuroscience and Biobehavioral Reviews* 2019, **102**:139-152.
7. El-Kogali SETaK, C. G.: **Expanding opportunities for the next generation : early childhood development in the Middle East and North Africa.** In.: The World Bank; 2015.
8. Victora CGea: **Maternal and child undernutrition: consequences for adult health and human capital.** *The Lancet* 2008, **371**(9609):340–357.
9. De Wolff MSavI, M. H.: **Sensitivity and attachment: a meta-analysis on parental antecedents of infant attachment.** *Child Development* 1997, **68**(4):571-591.
10. Kochanska Gea: **Pathways to conscience: early mother-child mutually responsive orientation and children's moral emotion, conduct, and cognition.** *Journal of Child Psychology and Psychiatry* 2005, **46**(1):19-34.
11. **Parenting Matters: Supporting Parents of Children Ages 0-8.** In. Washington DC: National Academies of Sciences; 2016.
12. Hamadani JD MS, Tofail F, Hasan MI, Huda SN, Baker-Henningham H, Ridout D, Grantham-McGregor S.: **Integrating an early childhood development programme into Bangladeshi primary health-care services: an open-label, cluster-randomised controlled trial.** *Lancet Global Health* 2019, **7**(3).
13. Gladstone M PJ, Thindwa R, Chitimbe F, Chidzalo K, Chandna J, Gleadow Ware S, Maleta K: **Care for Child Development in rural Malawi: a model feasibility and pilot study.** *Ann N Y Acad Sci* 2018, **1419**(1):102-119.
14. Nelson AK MA, Munoz M, et al: **CASITA: a controlled pilot study of community-based family coaching to stimulate early child development in Lima, Peru.** *BMJ Paediatrics Open* 2018.
15. Gelli A MA, Santacroce M, Sproule K, Theis S, Roschnik N, Twalibu A, Chidallengwa G, Cooper A, Moorhead T, Gladstone M, Kariger P, Kutundu M: **Improving child nutrition and development through community-based childcare centres in Malawi - The NEEP-IE study: study protocol for a randomised controlled trial** *Trials* 2017, **18**(1):284.
16. Chang SMea: **Integrating a Parenting Intervention With Routine Primary Health Care: A Cluster Randomized Trial.** *Pediatrics* 2015, **136**:272–280.

17. Brinkman SA, Hasan, A., Jung, H., Kinnell, A. Pradhan, M.: **The Impact of Expanding Access to Early Childhood Education Services in Rural Indonesia.** *Journal of Labor Economics* 2017, **35**(S1).
18. Black MM, Dewey, K.G.: **Promoting equity through integrated early child development and nutrition interventions.** *Annals Of The New York Academy Of Sciences* 2014, **1308**(Integrating Nutrition and Early Childhood Development Interventions):1-10.
19. Morelli G BK, Chaudhary N, Gottlieb A, Keller H, Murray M, Quinn N, Rosabal-Coto M, Scheidecker G, Takada A, Vicedo M: **Bringing the Real World Into Developmental Science: A Commentary on Weber, Fernald, and Diop (2017).** *Child Dev* 2018, **89**(6):e594-e603.
20. Petrovic OaY, A.: **Promoting Care for Child Development in Community Health Services.** In. New York, NY: UNICEF; 2013.
21. Miller AC, Rinaldo, N., Soplapuco, G., Condeso, A., Kammerer, B., Lundy, S., Faiffer, F., Montañez, A., Ramos, K., Rojas, N., Contreras, C., Muñoz, M., Valdivia, H., Vilca, D., Córdova, N., Hilario, P., Vibbert, M., Lecca, L., Shin, S.: **Success at Scale: Outcomes of Community-based Neurodevelopment Intervention (CASITA) for Children 6-20 months with Risk of Delay in Lima, Peru.** *Child Dev* 2021.
22. Bricker D SJ: **Ages and stages questionnaires: a parent completed, child monitoring system.** In. Edited by Brookes P, vol. 2nd edn. Baltimore, MD; 1999.
23. Lia C, Fernald, H., Kariger, P., Hidrobo, M., Gertler, P.J.: **Development gradients in low-income countries.** In: *Proceedings of the National Academy of Sciences.* vol. 109: National Academy of Sciences; 2012: 17273-17280.
24. Shaklee HaD, D.: **Survey of Parenting Practice: Tool Kit.** In. Edited by Idaho Uo. Moscow, Idaho; 2006.
25. **Multiple Indicator Cluster Survey.** In.: UNICEF; 2020.
26. Kroenke K SR, Williams JB: **The PHQ-9: validity of a brief depression severity measure.** *J Gen Intern Med* 2001, **16**(9):606-613.
27. Cates CB, Weisleder, A. and Mendelsohn, A. L.: **Mitigating the Effects of Family Poverty on Early Child Development through Parenting Interventions in Primary Care.** *Academic Pediatrics* 2016, **16**:S112-120.
28. Shah Rea: **Primary Care-Based Interventions to Promote Positive Parenting Behaviors: A Meta-analysis.** *Pediatrics* 2016, **137**(5).
29. Peacock-Chambers E, Ivy, K., Bair-Merritt, M.: **Primary Care Interventions for Early Childhood Development: A Systematic Review.** *Pediatrics* 2017(140).
30. Aboud FEaY, A. K.: **Reproductive, Maternal, Newborn, and Child Health: Disease Control Priorities,** vol. 2, 3rd edn. Washington D.C.: The International Bank for Reconstruction and Development / The World Bank; 2016.
31. Tomlinson M SS, Marlow M, Cluver L, Cooper P, Murray L, Mofokeng S, Morley N, Makhetha M, Gordon S, Esterhuizen T, Sherr L: **Improving early childhood care and development, HIV-testing, treatment and support, and nutrition in Mokhotlong, Lesotho: study protocol for a cluster randomized controlled trial.** *Trials* 2016, **17**(1):538.
32. Singla DR, Kumbakumba, E., Aboud, F. E.: **Effects of a parenting intervention to address maternal psychological wellbeing and child development and growth in rural Uganda: a community-based, cluster randomised trial.** *The Lancet Global Health* 2015, **3**(8):e458–e469.
33. Rayce SBea: **Effects of parenting interventions for at-risk parents with infants: a systematic review and meta-analyses.** *BMJ Open* 2017, **7**(12).

- 1  
2  
3 34. Schieber GJ: **Financing Global Health: Mission Unaccomplished.** *Health Affairs*  
4 2007, **26**(4):921-934.  
5  
6 35. Dieleman Jea: **Evolution and patterns of global health financing 1995–2014:  
7 development assistance for health, and government, prepaid private, and out-of-  
8 pocket health spending in 184 countries.** *The Lancet* 2017, **389**:1981–2004.  
9  
10 36. Dua Tea: **Global research priorities to accelerate early child development in the  
11 sustainable development era.** *The Lancet Global Health* 2016, **4**(12):e887-e889.  
12  
13 37. Clark Hea: **A future for the world’s children? A WHO–UNICEF–Lancet  
14 Commission.** *The Lancet* 2020, **395**:605-658.  
15  
16 38. Mechael Pea: **Barriers and gaps affecting mHealth in low and middle-income  
17 countries: policy white paper.** In. New York, NY: Columbia University; 2010.  
18  
19 39. Frehywot Sea: **E-learning in medical education in resource constrained low- and  
20 middle-income countries.** *Human Resources for Health* 2013, **11**(1).  
21  
22  
23  
24  
25  
26  
27  
28  
29  
30  
31  
32  
33  
34  
35  
36  
37  
38  
39  
40  
41  
42  
43  
44  
45  
46  
47  
48  
49  
50  
51  
52  
53  
54  
55  
56  
57  
58  
59  
60

Figure 1. Study Flow Diagram

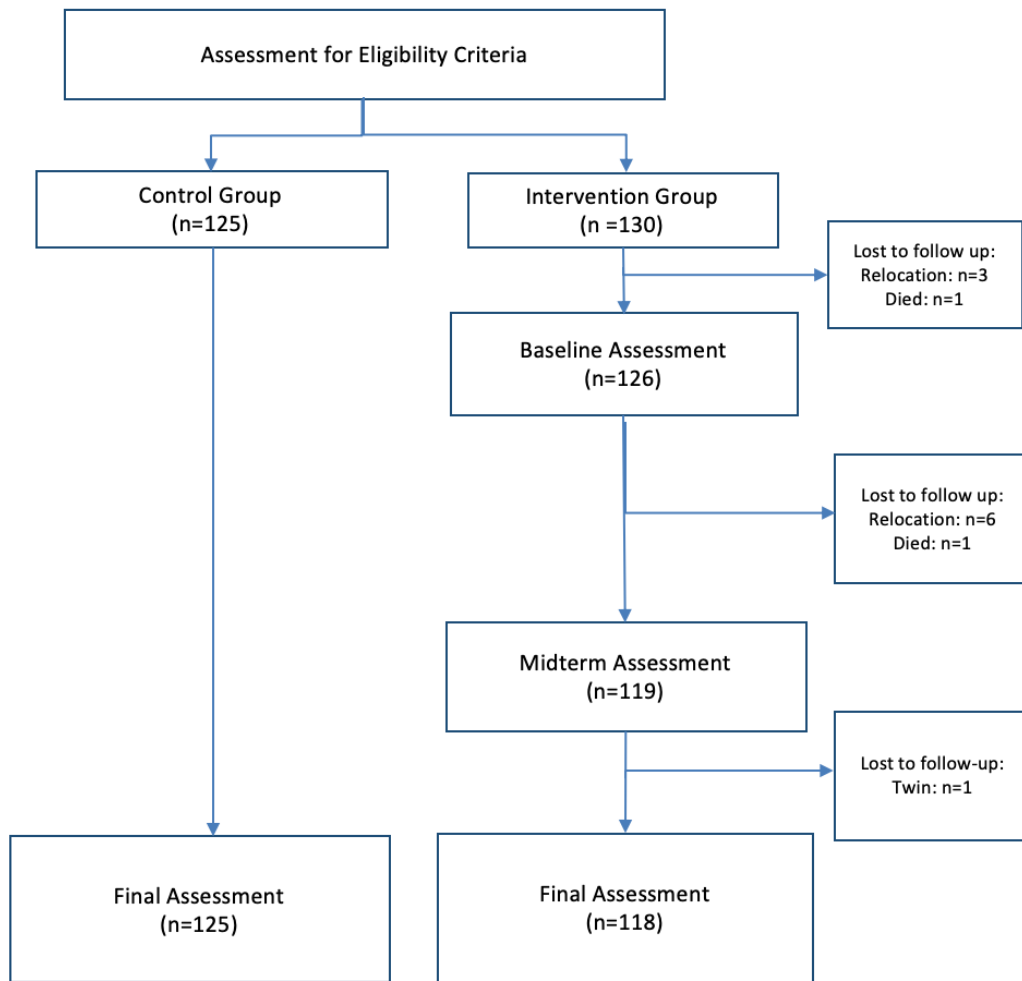

**Notes:** The control group comprised caregiver-infant dyads in which infants were 7-11 months-old in May-July 2017, the recruitment period. Caregiver-infant dyads in the control group were assessed immediately upon study enrolment only. The intervention group comprised caregiver-infant dyads in which infants were 0-2 months in May-July 2017. Caregiver-infant dyads in the intervention group were assessed three times (baseline, midterm, final assessment), with baseline assessment conducted immediately upon study enrollment and final assessment conducted seven months later, when infants were 7-11 months-old.

STROBE Statement—Checklist of items that should be included in reports of *case-control studies*

|                           | Item No | Recommendation                                                                                                                                                                                    | Page No |
|---------------------------|---------|---------------------------------------------------------------------------------------------------------------------------------------------------------------------------------------------------|---------|
| <b>Title and abstract</b> | 1       | (a) Indicate the study's design with a commonly used term in the title or the abstract                                                                                                            | 1       |
|                           |         | (b) Provide in the abstract an informative and balanced summary of what was done and what was found                                                                                               | 1       |
| <b>Introduction</b>       |         |                                                                                                                                                                                                   |         |
| Background/rationale      | 2       | Explain the scientific background and rationale for the investigation being reported                                                                                                              | 5-6     |
| Objectives                | 3       | State specific objectives, including any prespecified hypotheses                                                                                                                                  | 6       |
| <b>Methods</b>            |         |                                                                                                                                                                                                   |         |
| Study design              | 4       | Present key elements of study design early in the paper                                                                                                                                           | 6       |
| Setting                   | 5       | Describe the setting, locations, and relevant dates, including periods of recruitment, exposure, follow-up, and data collection                                                                   | 7-8     |
| Participants              | 6       | (a) Give the eligibility criteria, and the sources and methods of case ascertainment and control selection. Give the rationale for the choice of cases and controls                               | 9       |
|                           |         | (b) For matched studies, give matching criteria and the number of controls per case                                                                                                               | N/A     |
| Variables                 | 7       | Clearly define all outcomes, exposures, predictors, potential confounders, and effect modifiers. Give diagnostic criteria, if applicable                                                          | 11-12   |
| Data sources/measurement  | 8*      | For each variable of interest, give sources of data and details of methods of assessment (measurement). Describe comparability of assessment methods if there is more than one group              | 11-12   |
| Bias                      | 9       | Describe any efforts to address potential sources of bias                                                                                                                                         | 13      |
| Study size                | 10      | Explain how the study size was arrived at                                                                                                                                                         | 13      |
| Quantitative variables    | 11      | Explain how quantitative variables were handled in the analyses. If applicable, describe which groupings were chosen and why                                                                      | 11-12   |
| Statistical methods       | 12      | (a) Describe all statistical methods, including those used to control for confounding                                                                                                             | 13      |
|                           |         | (b) Describe any methods used to examine subgroups and interactions                                                                                                                               | N/A     |
|                           |         | (c) Explain how missing data were addressed                                                                                                                                                       | 13      |
|                           |         | (d) If applicable, explain how matching of cases and controls was addressed                                                                                                                       | N/A     |
|                           |         | (e) Describe any sensitivity analyses                                                                                                                                                             | N/A     |
| <b>Results</b>            |         |                                                                                                                                                                                                   |         |
| Participants              | 13*     | (a) Report numbers of individuals at each stage of study—eg numbers potentially eligible, examined for eligibility, confirmed eligible, included in the study, completing follow-up, and analysed | 10      |
|                           |         | (b) Give reasons for non-participation at each stage                                                                                                                                              | 10      |
|                           |         | (c) Consider use of a flow diagram                                                                                                                                                                | 22      |
| Descriptive data          | 14*     | (a) Give characteristics of study participants (eg demographic, clinical, social) and information on exposures and potential confounders                                                          | 19      |
|                           |         | (b) Indicate number of participants with missing data for each variable of interest                                                                                                               | 14      |
| Outcome data              | 15*     | Report numbers in each exposure category, or summary measures of exposure                                                                                                                         | 14      |

|    |                          |    |                                                                                                                                                                                                              |
|----|--------------------------|----|--------------------------------------------------------------------------------------------------------------------------------------------------------------------------------------------------------------|
| 1  |                          |    |                                                                                                                                                                                                              |
| 2  |                          |    |                                                                                                                                                                                                              |
| 3  |                          |    |                                                                                                                                                                                                              |
| 4  | Main results             | 16 | (a) Give unadjusted estimates and, if applicable, confounder-adjusted estimates and their precision (eg, 95% confidence interval). Make clear which confounders were adjusted for and why they were included |
| 5  |                          |    |                                                                                                                                                                                                              |
| 6  |                          |    |                                                                                                                                                                                                              |
| 7  |                          |    |                                                                                                                                                                                                              |
| 8  |                          |    |                                                                                                                                                                                                              |
| 9  |                          |    |                                                                                                                                                                                                              |
| 10 |                          |    |                                                                                                                                                                                                              |
| 11 |                          |    |                                                                                                                                                                                                              |
| 12 | Other analyses           | 17 | Report other analyses done—eg analyses of subgroups and interactions, and sensitivity analyses                                                                                                               |
| 13 |                          |    |                                                                                                                                                                                                              |
| 14 |                          |    |                                                                                                                                                                                                              |
| 15 | <b>Discussion</b>        |    |                                                                                                                                                                                                              |
| 16 | Key results              | 18 | Summarise key results with reference to study objectives                                                                                                                                                     |
| 17 |                          |    |                                                                                                                                                                                                              |
| 18 | Limitations              | 19 | Discuss limitations of the study, taking into account sources of potential bias or imprecision. Discuss both direction and magnitude of any potential bias                                                   |
| 19 |                          |    |                                                                                                                                                                                                              |
| 20 | Interpretation           | 20 | Give a cautious overall interpretation of results considering objectives, limitations, multiplicity of analyses, results from similar studies, and other relevant evidence                                   |
| 21 |                          |    |                                                                                                                                                                                                              |
| 22 |                          |    |                                                                                                                                                                                                              |
| 23 | Generalisability         | 21 | Discuss the generalisability (external validity) of the study results                                                                                                                                        |
| 24 |                          |    |                                                                                                                                                                                                              |
| 25 | <b>Other information</b> |    |                                                                                                                                                                                                              |
| 26 | Funding                  | 22 | Give the source of funding and the role of the funders for the present study and, if applicable, for the original study on which the present article is based                                                |
| 27 |                          |    |                                                                                                                                                                                                              |
| 28 |                          |    |                                                                                                                                                                                                              |
| 29 |                          |    |                                                                                                                                                                                                              |
| 30 |                          |    |                                                                                                                                                                                                              |
| 31 |                          |    |                                                                                                                                                                                                              |
| 32 |                          |    |                                                                                                                                                                                                              |
| 33 |                          |    |                                                                                                                                                                                                              |
| 34 |                          |    |                                                                                                                                                                                                              |
| 35 |                          |    |                                                                                                                                                                                                              |
| 36 |                          |    |                                                                                                                                                                                                              |
| 37 |                          |    |                                                                                                                                                                                                              |
| 38 |                          |    |                                                                                                                                                                                                              |
| 39 |                          |    |                                                                                                                                                                                                              |
| 40 |                          |    |                                                                                                                                                                                                              |
| 41 |                          |    |                                                                                                                                                                                                              |
| 42 |                          |    |                                                                                                                                                                                                              |
| 43 |                          |    |                                                                                                                                                                                                              |
| 44 |                          |    |                                                                                                                                                                                                              |
| 45 |                          |    |                                                                                                                                                                                                              |
| 46 |                          |    |                                                                                                                                                                                                              |
| 47 |                          |    |                                                                                                                                                                                                              |
| 48 |                          |    |                                                                                                                                                                                                              |
| 49 |                          |    |                                                                                                                                                                                                              |
| 50 |                          |    |                                                                                                                                                                                                              |
| 51 |                          |    |                                                                                                                                                                                                              |
| 52 |                          |    |                                                                                                                                                                                                              |
| 53 |                          |    |                                                                                                                                                                                                              |
| 54 |                          |    |                                                                                                                                                                                                              |
| 55 |                          |    |                                                                                                                                                                                                              |
| 56 |                          |    |                                                                                                                                                                                                              |
| 57 |                          |    |                                                                                                                                                                                                              |
| 58 |                          |    |                                                                                                                                                                                                              |
| 59 |                          |    |                                                                                                                                                                                                              |
| 60 |                          |    |                                                                                                                                                                                                              |

\*Give information separately for cases and controls.

**Note:** An Explanation and Elaboration article discusses each checklist item and gives methodological background and published examples of transparent reporting. The STROBE checklist is best used in conjunction with this article (freely available on the Web sites of PLoS Medicine at <http://www.plosmedicine.org/>, Annals of Internal Medicine at <http://www.annals.org/>, and Epidemiology at <http://www.epidem.com/>). Information on the STROBE Initiative is available at <http://www.strobe-statement.org>.



# BMJ Open

## Integrating an Early Child Development Intervention into an Existing Primary Health Care platform in Rural Lesotho: A prospective Case Control Study

|                                 |                                                                                                                                                                                                                                                                                                                                                                                                                                                                                                                                                                                                                                                                                                                                                                                                                                                                         |
|---------------------------------|-------------------------------------------------------------------------------------------------------------------------------------------------------------------------------------------------------------------------------------------------------------------------------------------------------------------------------------------------------------------------------------------------------------------------------------------------------------------------------------------------------------------------------------------------------------------------------------------------------------------------------------------------------------------------------------------------------------------------------------------------------------------------------------------------------------------------------------------------------------------------|
| Journal:                        | <i>BMJ Open</i>                                                                                                                                                                                                                                                                                                                                                                                                                                                                                                                                                                                                                                                                                                                                                                                                                                                         |
| Manuscript ID                   | bmjopen-2021-051781.R1                                                                                                                                                                                                                                                                                                                                                                                                                                                                                                                                                                                                                                                                                                                                                                                                                                                  |
| Article Type:                   | Original research                                                                                                                                                                                                                                                                                                                                                                                                                                                                                                                                                                                                                                                                                                                                                                                                                                                       |
| Date Submitted by the Author:   | 21-Dec-2021                                                                                                                                                                                                                                                                                                                                                                                                                                                                                                                                                                                                                                                                                                                                                                                                                                                             |
| Complete List of Authors:       | Ndayizigiye, Melino; Partners In Health<br>McBain, Ryan; RAND Corporation; Partners In Health, Economic Evaluation<br>Whelley, Collin; Partners In Health<br>Lerotholi, Rorisang; Partners In Health<br>Mabathoana, Joalane; Partners In Health<br>Carmona, Merida; Partners In Health<br>Curtain, Joe; Partners In Health<br>Birru, Ermyas; Partners In Health<br>Stulac, Sara; Boston University School of Medicine<br>Miller, Ann; Harvard Medical School, Global Health and Social Medicine<br>Shin, Sonya; Brigham and Women's Hospital, Division of Global Health Equity<br>Rumaldo, Nancy; Socios En Salud Sucursal Peru<br>Mukherjee, Joia; Partners In Health; Harvard Medical School, Global Health and Social Medicine<br>Nelson, Adrienne; Tulane University School of Public Health and Tropical Medicine, Global Community Health and Behavioral Sciences |
| <b>Primary Subject Heading</b>: | Global health                                                                                                                                                                                                                                                                                                                                                                                                                                                                                                                                                                                                                                                                                                                                                                                                                                                           |
| Secondary Subject Heading:      | Paediatrics                                                                                                                                                                                                                                                                                                                                                                                                                                                                                                                                                                                                                                                                                                                                                                                                                                                             |
| Keywords:                       | PAEDIATRICS, Public health < INFECTIOUS DISEASES, International health services < HEALTH SERVICES ADMINISTRATION & MANAGEMENT, HIV & AIDS < INFECTIOUS DISEASES, MENTAL HEALTH, Maternal medicine < OBSTETRICS                                                                                                                                                                                                                                                                                                                                                                                                                                                                                                                                                                                                                                                          |
|                                 |                                                                                                                                                                                                                                                                                                                                                                                                                                                                                                                                                                                                                                                                                                                                                                                                                                                                         |

SCHOLARONE™  
Manuscripts





I, the Submitting Author has the right to grant and does grant on behalf of all authors of the Work (as defined in the below author licence), an exclusive licence and/or a non-exclusive licence for contributions from authors who are: i) UK Crown employees; ii) where BMJ has agreed a CC-BY licence shall apply, and/or iii) in accordance with the terms applicable for US Federal Government officers or employees acting as part of their official duties; on a worldwide, perpetual, irrevocable, royalty-free basis to BMJ Publishing Group Ltd ("BMJ") its licensees and where the relevant Journal is co-owned by BMJ to the co-owners of the Journal, to publish the Work in this journal and any other BMJ products and to exploit all rights, as set out in our [licence](#).

The Submitting Author accepts and understands that any supply made under these terms is made by BMJ to the Submitting Author unless you are acting as an employee on behalf of your employer or a postgraduate student of an affiliated institution which is paying any applicable article publishing charge ("APC") for Open Access articles. Where the Submitting Author wishes to make the Work available on an Open Access basis (and intends to pay the relevant APC), the terms of reuse of such Open Access shall be governed by a Creative Commons licence – details of these licences and which [Creative Commons](#) licence will apply to this Work are set out in our licence referred to above.

Other than as permitted in any relevant BMJ Author's Self Archiving Policies, I confirm this Work has not been accepted for publication elsewhere, is not being considered for publication elsewhere and does not duplicate material already published. I confirm all authors consent to publication of this Work and authorise the granting of this licence.

**TITLE**

**Integrating an Early Child Development Intervention into an Existing Primary Health Care platform in Rural Lesotho: A prospective Case Control Study**

**AUTHORS**

Ndayizigiye, Melino<sup>1</sup>; McBain, Ryan K. <sup>2</sup>Whelley, Collin<sup>3</sup>; Rorisang Lerotholi<sup>1</sup>, Mabathoana, Joalane<sup>1</sup>; Carmona, Merida <sup>3</sup>; Curtain, Joe<sup>3</sup> ; Birru, Ermyas<sup>4</sup>; Stulac, Sara<sup>5</sup>; Miller, Ann C.<sup>6</sup>; Shin, Sonya S.<sup>7</sup>; Rumaldo, Nancy<sup>8</sup>; Mukherjee, Joia<sup>3,6</sup>; Nelson, Adrienne Katrina<sup>9</sup>

*<sup>1</sup>Partners In Health, Maseru, Lesotho; , MA, USA; <sup>2</sup>RAND Corporation, Boston, MA, USA. <sup>3</sup>Partners In Health, Boston. <sup>3</sup>Homebase Center for Common Concerns <sup>4</sup>University of Washington University School of Public Health, Department of Global Health, <sup>5</sup>Boston University School of Medicine, Boston, MA, USA; <sup>6</sup>Harvard Medical School, Department of Global Health and Social Medicine; <sup>7</sup>Brigham and Women's Hospital, Division of Global Health Equity, <sup>8</sup>Socios En Salud, Partners In Health Sucursal Peru, <sup>9</sup>Tulane University School of Public Health and Tropical Medicine, Department of Global Community Health and Behavioral Sciences;*

**CORRESPONDING AUTHOR**

Adrienne Katrina Nelson  
Tulane University School of Public Health and Tropical Medicine  
Department of Global Community Health and Behavioral Sciences  
1440 Canal St.  
New Orleans, LA 70112  
adrienne.katrina.nelson@gmail.com

## ABSTRACT

**Objectives:** This study evaluated a novel early child development (ECD) program integrated it into the primary healthcare system.

**Setting:** The intervention was implemented in a rural district of Lesotho from 2017-2018.

**Participants:** It targeted primary caregivers during routine post-natal care visits and through village health worker home visits.

**Intervention:** The hybrid care delivery model was adapted from a successful program in Lima, Peru and focused on parent coaching for knowledge about child development, practicing contingent interaction with the child, parent social support and encouragement.

**Primary and secondary outcomes measures:** We compared developmental outcomes and caregiving practices in a cohort of 130 caregiver-infant (ages 7-11 months-old) dyads who received the ECD intervention, to a control group that did not receive the intervention (n=125) using a case-control study design. Developmental outcomes were evaluated using the Extended Ages and Stages Questionnaire (EASQ), and caregiving practices using two measure sets (i.e. UNICEF MICS, Parent Ladder). Group comparisons were made using multivariable regression analyses, adjusting for caregiver-, infant- and household-level demographic characteristics.

**Results:** At completion, children in the intervention group scored meaningfully higher across all EASQ domains, compared to children in the control group: communication ( $\delta=0.21$ , 95%CI: 0.07-0.26), social development ( $\delta=0.27$ , 95%CI: 0.11-28), and motor development ( $\delta=0.33$ , 95%CI: 0.14-0.31). Caregivers in the intervention group also reported significantly higher adjusted odds of engaging in positive caregiving practices in four of six MICS domains, compared to caregivers in the control group—including book reading (AOR: 3.77, 95%CI: 1.94-7.29) and naming/counting (AOR: 2.05; 95%CI: 1.24-3.71).

**Conclusions:** These results suggest that integrating an ECD intervention into a rural primary care platform, such as in the Lesothoan context, may be an effective and efficient way to promote early child development outcomes.

## ARTICLE SUMMARY

### *Strengths and limitations of this study*

Unlike early child development programs adapted for lower resources settings from wealthier settings, this intervention was created and piloted in another rural LMIC (Peru).

The study demonstrated feasibility of integration of an ECD intervention in primary health care in rural and low resource settings

The use of an extended version of the Ages and Stages Questionnaire facilitated uptake but could introduce bias as it is a parent report tool.

While translations were done by a certified translator and then reviewed by study staff, the parenting measures, in particular the Parent Ladder, were not formally adapted and validated for this context.

We were unable to include patients in dissemination activities and in the future would extend patient involvement even further.

## INTRODUCTION

The period from prenatal development to three years of age is one of the most critical stages of brain development [1]. Malnutrition and stunting [2, 3] threaten to deny an estimated 250 million children under five (43%) with the opportunity to reach their full developmental potential [4]. Social forces common in low- and middle-income countries (LMICs), such as violence, abuse and neglect trigger the body's stress response system that can remain chronically activated into adulthood, straining the cardiovascular and central nervous systems [5, 6]. The impact of the culmination of these forces may be irreversible and contribute to a cycle of poverty, inequality, and social exclusion [7, 8]. For this reason, attention has been given to finetuning strategies to reach children living in poverty in LMICs through early childhood development (ECD) programs [9-11]. Many such programs have improved ECD, however, particularly in rural LMICs, they are primarily clinic or center-based interventions. Clinic-based studies such as that by Chang and colleagues' (2015) caregiving intervention in Jamaica demonstrate that clinic-based programs are effective in promoting cognitive development for children up to 18 months old [12]. This approach has the benefit of facilitating training and delivery for practitioners, but there may be shortcomings in terms of scale up and sustainability. Clinics in rural low-resource settings are routinely overwhelmed by the volume of patients presenting with physical health conditions and ECD screening is sidelined. The salary for a mental health professional in a clinical setting can be prohibitive when hospitals manage tight budgets and urgently needed personal and supplies are likely to be prioritized.

Caregivers of physically healthy children may have little incentive to attend clinics located long distances from their home and therefore participation may be low. Caregivers in Lesotho, for instance, walk up to 10 hours each way to reach a health center. This may be why community-based and integrated clinic-community interventions are rapidly becoming

1  
2  
3 the norm. Home- and community-based programs benefit from the low-cost of a community  
4 workforce [13]. Likewise, in home or community -based visitation programs, the family can  
5 participate. The family environment is widely accepted as a central focus for intervention,  
6 including social support and/or self-esteem building of the caregivers [14]. Caregivers have  
7 the unique opportunity to engage in positive interactions with their children beginning at a  
8 very young age, a practice which has been proven to nourish and even reverse early delay  
9 [15-17]. Community workers are experts in local knowledge and can be allies in adaptation  
10 of curricula to local contexts, an area of ECD interventions in LMICs that is receiving  
11 increasing attention from ECD scholars [18].

22  
23  
24 For this study, the team in Lesotho developed a hybrid community/ clinic-based ECD  
25 intervention adapted from two ECD interventions which have shown impact in other rural  
26 LMICs. Village health workers (VHWs) delivered the home-based intervention as part of  
27 their routine activities, while leveraging post-natal care visits—during which caregivers are  
28 already attending primary care facilities with their children for immunizations—for  
29 enrollment and ECD intervention initiation [19].

30  
31  
32 This pilot study evaluates the impact of this hybrid delivery model on ECD outcomes  
33 and caregiving practices by comparing a cohort of caregiver-infant (7–11-month-old) dyads  
34 who received the intervention, to a comparable cohort that did not receive the intervention.  
35 We hypothesized that the delivery model would successfully engage parent-child dyads, and  
36 that the intervention would increase developmentally supportive parenting practices in turn  
37 improving developmental outcomes.

## 38 39 40 41 42 43 44 45 46 47 48 49 50 51 52 53 **MATERIALS AND METHODS**

### 54 55 56 *Study design*

1  
2  
3 This is a prospective case control pilot study to test the impact of an early intervention  
4 with a hybrid delivery model on 1) improved ECD outcomes, 2) caregiver-child interaction,  
5 and 3) developmentally supportive caregiving practices. The latter two were chosen as they  
6 have been shown to be mediators between ECD interventions focused on parent coaching and  
7 ECD outcomes.  
8  
9  
10  
11  
12  
13  
14  
15  
16

### 17 ***Study Setting***

18  
19 This study took place within the catchment area of Nkau Health Center in the district  
20 of Mohale's Hoek District, Lesotho. Nkau Health Center is a rural clinic in Lesotho's  
21 mountainous southwestern region, with an estimated catchment population of 15,000 persons  
22 as of 2016 (Lesotho Ministry of Health and ICF International, 2016). The health center is a  
23 public government clinic supported by the medical NGO Partners In Health. Two types of  
24 VHWs are integrated into primary healthcare teams across all villages in the catchment area,  
25 with one VHW cadre focused on HIV and TB, and the other focused on maternal and child  
26 health.  
27  
28  
29  
30  
31  
32  
33  
34  
35  
36  
37  
38  
39

### 40 ***Intervention***

41  
42 This program was developed from an existing program called CASITA which showed  
43 positive impact at scale in rural LMIC settings [20]. A community-based ECD intervention in  
44 Carabayllo, a low-resource community outside of Lima, Peru, CASITA was developed by  
45 our sister organization Socios En Salud (Partners In Health Succursal Peru) and is now  
46 scaling up to over 3,455 children. CASITA, adapted for use from the SPARK Center's ECD  
47 program for children living in poverty at Boston Medical Center, involves four featured  
48 components of ECD training sessions: 1) knowledge sharing about child development and  
49 child observation; 2) demonstration and initiation of social interaction activities tailored to  
50  
51  
52  
53  
54  
55  
56  
57  
58  
59  
60

1  
2  
3 the child's development; 3) caregiver encouragement on caregiving behavior and  
4 development interactions; and 4) caregiver social support and reassurance. In the pilot study,  
5 children ages 6-24 months who screened at risk of delay received either individual home-  
6 visits or group sessions with this curriculum, along with nutritional supplements. Those in the  
7 intervention group improved ECD significantly compared to the control group in all areas of  
8 delay [11]. Caregivers and community health representatives widely agreed that individual  
9 home visits and group gatherings in local community centers outside of the clinic was central  
10 to its success [11]. We borrowed the curricula and session structure and spacing from  
11 CASITA (Table 1a and b).  
12  
13  
14  
15  
16  
17  
18  
19  
20  
21  
22  
23

24 **[Insert Table 1a and b]**

25  
26 All dyads in the intervention group were invited to participate in seven caregiver  
27 education sessions of 4-6 dyads each. Sessions at weeks 6, 10, 14, and 18 took place at Nkau  
28 Health Center and were conducted by a trained ECD nurse in a group setting. These dates  
29 corresponded to Lesotho's national immunization schedule, so families did not have to travel  
30 to the clinic for additional visits. Caregivers who either couldn't make group sessions due to  
31 scheduling or missed sessions were targeted for individual outreach by VHWs. Of the 119  
32 participating dyads, 100% completed sessions at 6, 10, and 14 weeks, and 83 (70%)  
33 completed the final session at 18 weeks. The remaining three sessions (8, 12 and 16 weeks)  
34 were conducted by maternal health VHWs in dyads' households. Of those, 88 (74%)  
35 completed the 8-week session, 75 (63%) completed the 12-week session, and 85 (71%)  
36 completed the 16-week session. VHWs were charged with leading these sessions as they  
37 work primarily in the community, whereas ECD nurses are based in the clinic. The ECD  
38 nurse conducted unannounced spot checks of VHWs to ensure they were conducting the  
39 intervention as intended. An assessment form was completed by the ECD nurse indicating  
40 whether each activity was completed as intended. She met with the VHW after the visit and  
41  
42  
43  
44  
45  
46  
47  
48  
49  
50  
51  
52  
53  
54  
55  
56  
57  
58  
59  
60



1  
2  
3 reviewed the assessment. VHWs were given an additional individual training session if one  
4 part of the session was not completed accurately. After the seven sessions were completed,  
5  
6  
7 VHWs continued to conduct regular home visits focused on maternal and child health.  
8  
9

10 There were two deviations from the original program design: while the intervention was  
11 based on group sessions at health centers, flooding and scheduling challenges within villages  
12 required unanticipated one-on-one sessions by VHWs. Caregivers who missed sessions  
13  
14 required targeted outreach, including additional VHW visitations to homes to ensure all  
15  
16  
17  
18  
19 caregivers received the complete intervention.  
20  
21  
22

### 23 ***Training***

24  
25  
26 One researcher involved in creating and piloting CASITA traveled to Lesotho and  
27 trained 80 VHWs together with the head ECD nurse, who in turn coached caregivers while  
28 modeling positive caregiving behaviors. Training took place at the Nkau Health Center over  
29  
30 three days and all VHWs traveled to the clinic to attend. Training involved lecture-style  
31  
32 sessions in English with video examples of key concepts, translated into Sesotho, didactic  
33  
34 small-group discussions, and practice with individualized feedback. Refresher trainings for  
35  
36  
37 the Village Health Workers were conducted on monthly basis (four total) during the VHWs  
38  
39 regular meetings at the clinic. During this meeting, all 80 VHWs practiced delivering home  
40  
41 sessions for which they received feedback and the opportunity to clarify questions arising in  
42  
43 the field. The ECD nurse reviewed the home visit agenda at each meeting and focused on  
44  
45 problem areas observed during her unannounced fidelity visits. Refresher trainings lasted  
46  
47  
48  
49 approximately two to three hours each.  
50  
51  
52  
53  
54  
55

### 56 ***Patient and Public Involvement***

57  
58  
59  
60

1  
2  
3 During adaptation, each aspect of the Lesothoan curricula was reviewed with the  
4 CASITA researcher (AKN) and the ECD Nurse (RL) at the village health center in May  
5  
6 2017. Draft adaptations were noted on all curricula materials and then discussed with one  
7  
8 VHW and one local mother. Final changes were made on consensus with the on-site Principal  
9  
10 Investigator (MN) and Maternal and Child Health Program Manager (JM). Two to three  
11  
12 patients were involved in the adaptation of the intervention. Women received the intervention  
13  
14 in a draft phase and were asked about their reactions. Opinions were incorporated into the  
15  
16 intervention design. Care was taken to consider local childrearing practices, of particular  
17  
18 importance given increased concern about the cultural relevance of ECD interventions being  
19  
20 transposed to LMICs from other contexts [18]. Findings from this study will not be formally  
21  
22 shared with study participants, however, health professionals at the clinic will be presented  
23  
24 with the findings at a staff meeting and invited to respond to patients' questions during  
25  
26 clinical visits.  
27  
28  
29  
30  
31  
32  
33  
34

### 35 ***Study Sample***

36  
37 Recruitment for the control and intervention groups started in May and July 2017,  
38  
39 respectively. For the intervention group, dyads with children ages 0-6 weeks receiving  
40  
41 postnatal care (PNC) services at clinics in Mohale's Hoek were recruited and offered  
42  
43 enrollment in the intervention. Children who were born more than two weeks prematurely  
44  
45 and with severe developmental delays were excluded.  
46  
47  
48

49 As a control comparison, we identified a cohort of caregiver-infant dyads residing in  
50  
51 the same catchment area, among whom infants were already 7-11 months old and therefore  
52  
53 not eligible for the intervention. Comparison dyads were assessed with the same set of  
54  
55 measures as the intervention group, solely during the intervention group's baseline period. As  
56  
57 such, the comparison of interest was between the intervention group at end line (when infants  
58  
59  
60

1  
2  
3 were 7-11 months old) versus the control group at baseline (when infants were 7-11 months  
4  
5 old). The comparisons were adjusted using all demographic information and covariates.  
6

7  
8 259 dyads were screened. Of these 259 dyads, 255 were enrolled: 125 dyads in the  
9  
10 control group and 130 dyads in the intervention group. No families refused participation.  
11  
12 Three children were born prematurely, and one child was found to have mild to severe  
13  
14 developmental delays and thus, were excluded from the sample. At the point of analysis  
15  
16 within the intervention group, nine dyads withdrew from the study, two were deceased, and  
17  
18 one of a set of twins was removed from analysis to prevent bias occurring from including  
19  
20 multiple children within a single household [Figure 1].  
21  
22  
23  
24  
25

## 26 **Measures**

27  
28 *ECD Measures.* ECD was assessed using the Extended Ages and Stages Questionnaire  
29  
30 (EASQ), an adapted version of the Ages and Stages Questionnaire (ASQ) [21], with the same  
31  
32 questions presented in continuous format, allowing for pre- and post- score comparison  
33  
34 across ages [11, 22]. It screens for developmental risk with three domains: communication  
35  
36 (e.g. “If you repeat the sounds your baby makes, does s/he repeat them again after you?”),  
37  
38 social/personal development (e.g. “When you reach out your hand to ask for a toy, does baby  
39  
40 hand it to you?”), and motor development (e.g. “When your baby is lying face down, can he  
41  
42 stretch his arms and lift his chest off the bed or floor?”). Response options are yes,  
43  
44 sometimes, and no. A few words on the EASQ were changed for applicability in Sesotho. For  
45  
46 instance, on the 4-6 Month item #25.7.10 which reads, “Does your baby make rounds like  
47  
48 “ma,” “da,” “ga,” “ca” and “ba”?“, the team removed “ga” and “ca” and added “aaa” and  
49  
50 “na” to mimick early sounds in Sesotho. The ASQ is widely used internationally and its  
51  
52 psychometric properties among South African and Zambian children are consistent with other  
53  
54  
55  
56  
57  
58  
59  
60 populations [23].

1  
2  
3  
4  
5  
6 *Caregiver Measures.* Caregiver engagement was measured using the self-report  
7  
8 Parent Ladder [24], an omnibus measure of caregiver engagement designed to measure  
9  
10 knowledge, skills and behavior. This scale contains 12 items on a seven-point ordinal scale  
11  
12 ranging from 0 (lowest) to 6 (highest) with questions such as “Knowledge of how my child is  
13  
14 growing and developing?” and “Ability to identify my child’s needs?”. The global score was  
15  
16 used to measure caregiver engagement. Second, six questions from UNICEF’s Multiple  
17  
18 Indicator Cluster Survey: for Children Under Five [25] were selected to measure in-home  
19  
20 caregiver-child interaction. Questions contain four multiple-response options (“mother”,  
21  
22 “father”, “other”, “no one”), and questions such as: “In the past 3 days, did you or any  
23  
24 household member engage in any of the following activities with your baby: (1) Read books  
25  
26 or looked at a picture books with baby?” and “(2) ...sang songs to baby, including  
27  
28 lullabies?”.

29  
30  
31  
32  
33 All measures were translated into Sesotho by a certified translator and checked with  
34  
35 the ECD nurse fluent in English, then double-checked with the site PI and MCH program  
36  
37 manager to ensure meaning was correct. All questions regarding meaning were discussed  
38  
39 with a Boston-based ECD researcher.

40  
41  
42 Caregiver socioeconomic status was measured by educational attainment and  
43  
44 household assets. Depressive symptoms were measured using the PHQ-9 [26]. Other  
45  
46 covariates such as sex, age, height/length, and weight, were recorded for each child at every  
47  
48 data collection point.

49  
50  
51 Data were collected on tablets and site supervisors attended 10% of data collection  
52  
53 events in which they completed the assessment simultaneously and discussed discrepancies  
54  
55 with the data collector. Changes were made and the site supervisor recorded discordant  
56  
57  
58  
59  
60

1  
2  
3 questions as a percent. Follow-up training was done if 20% or more questions were  
4  
5 discordant.  
6  
7  
8  
9

### 10 *Statistical Analysis*

11  
12 It was determined that 250 participants must be enrolled in order to detect statistical  
13  
14 significance of  $\alpha = .05$  with a power of .80 for the primary outcome variables. This study  
15  
16 enrolled 255 participants. As a preliminary review of the data, correlations between the  
17  
18 outcome variables and covariates were inspected using Pearson coefficients. Bivariate  
19  
20 analyses then examined individual relationships between independent variables (see above)  
21  
22 and outcomes of interest. Based on these preliminary analyses, we identified a consistent  
23  
24 pattern of expected associations, indicating acceptable concurrent validity, and did not  
25  
26 identify any correlations that were so strong ( $r > 0.70$ ) they may be indicative of collinearity in  
27  
28 statistical models.  
29  
30  
31  
32

33 Following preliminary review, the intervention and control groups were compared  
34  
35 using univariate and multivariable regression analysis: multivariable linear regression for  
36  
37 continuous outcomes such as child EASQ scores, and multivariable logistic regression for  
38  
39 binary outcomes, such as caregiving behaviors, documented in the MICS survey. These  
40  
41 comparisons examined child development outcomes and caregiving outcomes between  
42  
43 groups, adjusting for covariates in order to safeguard against omitted variable bias. Analyses  
44  
45 Used STATA's xtreg command to account for autocorrelation and clustering of multiple data  
46  
47 points within individuals over time (StataCorp, 2017).  
48  
49  
50

51 EASQ analysis was stratified by the test age group (7-9 month vs. 10-11 month), and  
52  
53 then merged with a dummy variable to represent test type. To ensure appropriateness of  
54  
55 intervention and control group comparisons, dyads were compared when infants were within  
56  
57 the same age group: namely, 7-11 months old.  
58  
59  
60

## RESULTS

Of the 119 intervention dyads, 100% completed 14 weeks and 83 (70%) completed all 18 weeks. All those completing 14 sessions were included in final analysis, with the exception of one twin who was removed to prevent family bias. In the end, 243 participants had final outcome data.

Of the final sample, mean age of caregiver was 24.8 years and 64% had finished primary school. Mean parity was 2.12 and almost 10% had their last child at home. Slightly more than half (57%) of the infants. Some children showed signs of wasting (15%) and stunting (5%) at 9 months (Table 2).

The control and intervention groups were similar across most demographic characteristics, including immunization completion rates and percentage of clinic-based deliveries. Caregivers in the intervention were slightly more educated and younger, and scored modestly higher on the PHQ-9 depression score at endline, as well as reporting more frequent antenatal care visits. Children of caregivers in the intervention group were slightly younger and had lower anthropomorphic z-scores. Table 2 contains detailed demographic indicators. All covariates were incorporated in final multivariable regression models, regardless of statistical significance, as we determined relevance of covariates a priori based on evidence in child development literature.

**[Insert Table 2]**

### *Early Child Development Outcomes*

Adjusting for covariates, at endline, children in the intervention group scored higher on EASQ measures across all domains: total score, communication, social, and motor development. Moreover, these results were consistent regardless of whether the age range

1  
2  
3 was restricted to 7-9 months at endline, 10-11 months at endline, or pooled, with the one  
4 exception being communication in the 7 to 9-month group, for which the intervention group  
5 observed non-significantly higher scores ( $p=0.08$ ). An overview of results, measured in terms  
6 of standard deviation (SD) improvements from baseline to endline, is presented in Table 3.  
7  
8  
9  
10  
11  
12  
13

14  
15 **[Insert Table 3]**  
16

### 17 18 19 *Caregiver Outcomes* 20

21 Results also indicated marked improvement on the Parent Ladder in the intervention  
22 group compared to the control group. Caregivers in the intervention group were 17 points  
23 higher at endline (44%), compared to the control group ( $\delta=1.57$ ,  $p<0.001$ ). Differences  
24 remained significant ( $\delta=0.56$ ,  $p<0.05$ ) after adjusting for covariates in the context of  
25 multivariate regression.  
26  
27  
28  
29  
30  
31

32 Similarly, the intervention was associated with greater odds of affirmative responses  
33 on all but one MICS items (Table 4). MICS results suggested that caregivers in the  
34 intervention group were: 3.7 times more likely to read a book to their child in the past three  
35 days, 13.8 times more likely to tell stories, 2.3 times more likely to sing songs, 2.8 times  
36 more likely to engage in play, and 2.1 times more likely to name, count, or draw with their  
37 child.  
38  
39  
40  
41  
42  
43  
44  
45  
46  
47  
48

49 **[Insert Table 4]**  
50

## 51 52 **DISCUSSION** 53

54 We implemented an early childhood development intervention in the Nkau Health  
55 Center catchment area of Mohale's Hoek, Lesotho, one of the more rural, remote regions of  
56 the country. A total of 130 dyads were enrolled in the intervention over a 6-month period,  
57  
58  
59  
60

1  
2  
3 representing the vast majority of new mothers (>90%) attending the clinic. As such, our  
4 findings suggest acceptability and feasibility for broad implementation in similar rural  
5 settings, including other districts of Lesotho. More importantly, the intervention indicated  
6 marked positive impacts on both children and caregivers enrolled.  
7  
8  
9  
10  
11

12 Children whose caregivers participated in the ECD intervention observed significantly  
13 greater improvements in all developmental domains compared to a control group of the same  
14 age range. Associated effect sizes were also clinically meaningful—particularly in the older  
15 age range of 9 to 11-month-old infants, where group standardized mean differences ranged  
16 from 0.30 to 0.50 after adjusting for covariates. We found that caregivers in the intervention  
17 group significantly improved their caregiving skills, knowledge and confidence, relative to  
18 those in the control group and were more likely engage in interactions with children  
19 following receipt of the intervention.  
20  
21  
22  
23  
24  
25  
26  
27  
28  
29

30 While several studies have shown ECD improvements through caregiver interventions  
31 [27-29], most interventions in LMICs have targeted children older than one year [30]. One  
32 study, conducted in another rural region of Lesotho still underway, is engaging children ages  
33 1-5 and their caregivers in eight sessions that included HIV and nutritional education and an  
34 ECD component involving book sharing to encourage caregiver-child engagement [31].  
35 Likewise, a community-based caregiver intervention by Singla and colleagues (2015) in  
36 Uganda resulted in cognitive improvements among children aged 12-36 months [32].  
37 Evidence from high-resource settings indicates that ECD interventions targeted at this first  
38 year of child development may be particularly beneficial [17, 33], as the impacts on  
39 caregiving behaviors and developmental outcomes are likely to carry forward over the course  
40 of childhood. Our study shows this may also be true in settings of poverty within LMICs.  
41  
42  
43  
44  
45  
46  
47  
48  
49  
50  
51  
52  
53  
54

55 Our study employed a strategic hybrid delivery model. As such, integrating ECD  
56 interventions into postnatal care services, as modeled in our study, offers a convenient way  
57  
58  
59  
60



1  
2  
3 for caregivers to learn about cognitive development and child stimulation techniques while  
4 already in attendance at clinics, at a very early stage in the child's life. Lessons provided at  
5  
6 clinics can then be reinforced through VHWs who are operating in community-based  
7  
8 settings, further reducing the onus that might otherwise be placed on caregivers to attend  
9  
10 educational sessions. Several new studies are enrolling participants using a similar integrated  
11  
12 model in other LMICs such as Bangladesh [9].  
13  
14  
15

16  
17 Even still, ECD interventions in low-resource settings may be forgone because scarce  
18  
19 resources limit government capacity to equip clinics and train health care workers [34, 35].  
20  
21 These tradeoffs are inherent in many budgetary decisions, where maternal and child health  
22  
23 are underfunded relative to other clinical care domains [36, 37]. Furthermore, rural  
24  
25 communities often lack information provided through the internet and other e-learning  
26  
27 platforms that might otherwise educate physicians, healthcare professionals and caregivers on  
28  
29 how to encourage children's cognitive and physical development [38, 39]. In such context,  
30  
31 enhanced caregiver knowledge through ECD interventions based in the community may be  
32  
33 introduced at low cost by building off of existing primary health care infrastructure. The  
34  
35 framework outlined in this study offers a successful illustration of this.  
36  
37  
38  
39

40 A few study limitations should be mentioned. There is a potential for unmeasured  
41  
42 differences between the intervention and control groups, which could account for some level  
43  
44 of difference in ECD outcomes. We attempted to mitigate this possibility by gathering a wide  
45  
46 range of covariates. Likewise, magnitude of the observed impact of the intervention was  
47  
48 sizable, making a Type 1 error relatively unlikely.  
49  
50

51 A third consideration is participant response bias. Measures were dependent on self-  
52  
53 reports of caregivers and repeated administration of tests. It is possible, for example, that  
54  
55 those in the intervention group believed survey administrators wanted to hear that caregiving  
56  
57 behavior and ECD outcomes improved over time. This could overestimate the impact of the  
58  
59  
60

1  
2  
3 intervention on ECD. The fact that this intervention was adapted from a mixed urban and  
4 rural setting in Peru may suggest the external validity of the program. However, its use in  
5 other African settings would depend on the similarity of the culture and setting and the  
6 careful adaptation of the content.  
7  
8  
9  
10  
11

12 Further research calls on qualitative data such as focus groups to understand what aspects  
13 of the intervention were useful and how the caregivers believed their practices changed in  
14 response to the sessions.  
15  
16  
17  
18  
19

## 20 **CONCLUSIONS**

21  
22 This study demonstrated significant effects of an ECD intervention on early child  
23 development, as well as caregiver knowledge and skills. The intervention was implemented  
24 with few resources by leveraging existing human resources and health system infrastructure.  
25 Based on this, we are hopeful to scale the intervention more broadly in districts throughout  
26 rural Lesotho.  
27  
28  
29  
30  
31  
32  
33  
34  
35  
36  
37  
38  
39  
40  
41  
42  
43  
44  
45  
46  
47  
48  
49  
50  
51  
52  
53  
54  
55  
56  
57  
58  
59  
60

**Table 1a. Group Session Activity Agendas**

| Activity   | Time (minutes) | Name                                                  | Description                                                                                                                                                                                                                                                                                                                                                                                                                                                                                                                              |
|------------|----------------|-------------------------------------------------------|------------------------------------------------------------------------------------------------------------------------------------------------------------------------------------------------------------------------------------------------------------------------------------------------------------------------------------------------------------------------------------------------------------------------------------------------------------------------------------------------------------------------------------------|
| Activity 1 | 10             | Program introductions<br>Introductions<br>Ice breaker | Facilitator introduces the program<br>Dyad introduction<br>In a box, collect items that symbolize ideas and activities: toys, hygiene item, object that can be used as a toy, nursing item, info on vaccines, picture of mom playing with baby, picture of baby clapping, etc. Each participant picks out an object and they describe how they think it relates to the overall topic of the project. This will allow introduction of the project content and allow caregivers to express their understanding of pertinent project items. |
| Activity 2 | 5              | Group norms                                           | Confidentiality, importance of learning from each other, agenda for the day, etc...                                                                                                                                                                                                                                                                                                                                                                                                                                                      |
| Activity 3 | 5              | Tips                                                  | Tip related to child health and hygiene: 1) washing hands; 2) skin care for the baby (umbilical cord care); 3) perinatal care/ caring for the body after birth<br>Provide a handout with information.                                                                                                                                                                                                                                                                                                                                    |
| Activity 4 | 30             | “Serve and return” concepts and practice              | Play and Communication Activities: refer to activity guide<br>Free play in small groups: Caregivers can choose the game and groups as small as 2 dyads practice “serve and return”.<br>Facilitator and assistant give suggestions/ congratulations to each group; flip charts can give ideas if needed.                                                                                                                                                                                                                                  |
| Activity 5 | 30             | Home experience /Social support and problem solving   | Each mom shares experiences or ideas of stimulation and playing games in the home. If not first session, practice since the last session<br>Open conversation: Reflect on and offer examples of barriers to stimulation in the home and/or frustrations related to their child’s development. Reach out to the group to brainstorm solutions and ideas on how to better integrate lessons learned from the group to daily life                                                                                                           |
| Activity 6 | 15             | Close                                                 | Reflection on the session and suggestions and tips shared between caregivers. The facilitator and assistant will encourage caregivers’ enthusiasm. End with the same song every session to allow for another exercise to engage the caregiver and infant.                                                                                                                                                                                                                                                                                |

**Table 1b. Session Activity Agendas**

| Activity   | Time (minutes) | Name                                      | Description                                                                                                                                                                                                                                                                                                                                                                                                            |
|------------|----------------|-------------------------------------------|------------------------------------------------------------------------------------------------------------------------------------------------------------------------------------------------------------------------------------------------------------------------------------------------------------------------------------------------------------------------------------------------------------------------|
| Activity 1 | 5              | MVHW Introduction<br>Family Introductions | I would like to spend some time understanding how the family is getting on with the play and communication activities recommended from the group sessions at the clinic on early childhood development.                                                                                                                                                                                                                |
| Activity 2 | 30             | Home experience and problem solving       | Talk to mom about experiences of stimulation and playing games in the home. Ask about progress since group session. Ask to see an example of an activity that the caregiver does with the child. Ask caregiver to reflect on and offer examples of barriers to stimulation in the home and/or frustrations related to their child's development<br>*Remember to praise and encourage caregiver and reassure caregiver. |
| Activity 3 | 30             | "Serve and return" concepts and practice  | Play and Communication Activities: refer to individual session activity guide<br>With mom and any additional family member pick one play activity and one communication activity per visit to observe with caregiver.                                                                                                                                                                                                  |
| Activity 4 | 15             | Close                                     | Ask caregiver if they have any questions and/or concerns<br>Reiterate concepts and importance of play and communication activities<br>Plan for next visit                                                                                                                                                                                                                                                              |

**Table 2: Baseline Characteristics of Intervention and Control Groups**

| Demographic Measures: Binary     | Control Group<br>N (%) | Intervention Group<br>N (%) |
|----------------------------------|------------------------|-----------------------------|
| Caregiver                        |                        |                             |
| Female                           | 124 (99%)              | 117 (99%)                   |
| Primary school complete          | 71 (57%)               | 84 (71%)*                   |
| Birth at home                    | 10 (8%)                | 13 (11%)                    |
| Infant                           |                        |                             |
| Female                           | 73 (58%)               | 65 (55%)                    |
| Evidence of wasting              | 14 (11%)               | 22 (18%)*                   |
| Evidence of stunting             | 5 (4%)                 | 6 (5%)                      |
| Underweight                      | 7 (6%)                 | 10 (8%)*                    |
| Fully Immunized at 9 months      | 125 (100%)             | 112 (95%)                   |
| Demographic Measures: Continuous | Mean (SD)              | Mean (SD)                   |
| Caregiver                        |                        |                             |
| Age (years)                      | 26.01 (7.18)           | 23.50 (6.32)*               |
| Parity                           | 2.18 (1.56)            | 2.06 (1.50)                 |
| Gravida                          | 2.27 (1.64)            | 2.21 (1.68)                 |
| Pregnancy weeks at birth         | 38.82 (1.72)           | 38.79 (1.50)                |
| ANC visits                       | 3.03 (1.16)            | 3.35 (1.04)*                |
| Household members                | 5.92 (2.12)            | 5.75 (2.19)                 |
| Depression score                 | 2.98 (3.08)            | 5.18 (5.18)*                |
| Infant                           |                        |                             |
| Age (months)                     | 9.40 (0.32)            | 9.30 (0.31)*                |
| Weight for height                | -0.44 (1.45)           | -1.03 (1.22)*               |
| Length for age                   | 0.75 (2.08)            | 0.69 (1.63)*                |
| Weight for age                   | 0.12 (1.22)            | -0.60 (1.02)*               |

\* Difference between control and intervention groups  $p < .05$

**Table 3: Early Child Development Outcomes on EASQ – Difference by Group**

| EASQ Category             | Mean Difference | 95% CI      | Standardized Coefficient | 95% CI       | Adj R <sup>2</sup> | Obs. |
|---------------------------|-----------------|-------------|--------------------------|--------------|--------------------|------|
| <b>Communication</b>      |                 |             |                          |              |                    |      |
| EASQ 7-9 month            | 0.11            | 0.03 - 0.18 | 0.09                     | -0.03 - 0.14 | 0.08               | 184  |
| EASQ 10-11 month          | 0.50*           | 0.23 - 0.76 | 0.34*                    | 0.14 - 0.62  | 0.41               | 59   |
| Combined                  | 0.27*           | 0.00 - 0.18 | 0.21*                    | 0.07 - 0.26  | 0.22               | 243  |
| <b>Social Development</b> |                 |             |                          |              |                    |      |
| EASQ 7-9 month            | 0.11*           | 0.03 - 0.19 | 0.15*                    | 0.01 - 0.17  | 0.07               | 184  |
| EASQ 10-11 month          | 0.49*           | 0.26 - 0.73 | 0.42*                    | 0.20 - 0.63  | 0.42               | 59   |
| Combined                  | 0.27*           | 0.19 - 0.36 | 0.27*                    | 0.11 - 0.28  | 0.26               | 243  |
| <b>Motor Development</b>  |                 |             |                          |              |                    |      |
| EASQ 7-9 month            | 0.14*           | 0.07 - 0.21 | 0.26*                    | 0.07 - 0.24  | 0.05               | 184  |
| EASQ 10-11 month          | 0.46*           | 0.20 - 0.71 | 0.46*                    | 0.23 - 0.75  | 0.19               | 59   |
| Combined                  | 0.22*           | 0.16 - 0.32 | 0.33*                    | 0.14 - 0.31  | 0.12               | 243  |
| <b>Total Score</b>        |                 |             |                          |              |                    |      |
| EASQ 7-9 month            | 0.12*           | 0.06 - 0.18 | 0.21*                    | 0.03 - 0.17  | 0.06               | 184  |
| EASQ 10-11 month          | 0.48*           | 0.30 - 0.66 | 0.51*                    | 0.26 - 0.60  | 0.48               | 59   |
| Combined                  | 0.24*           | 0.20 - 0.33 | 0.32*                    | 0.13 - 0.27  | 0.26               | 243  |

Notes: \* $p < 0.05$ . Adjusted multivariable regression included child sex and age, as well as caregiver education, socioeconomic status, and fixed effects for research staff members conducting the assessment. "95% CI stands for 95% Confidence Interval.

**Table 4. Caregiver Engagement – Difference by Group**

| MICS Measure    | Adj. OR | 95% CI       | Pseudo R <sup>2</sup> |
|-----------------|---------|--------------|-----------------------|
| Read book       | 3.77*   | 1.94 - 7.29  | 0.14                  |
| Told stories    | 13.75*  | 6.32 – 29.90 | 0.27                  |
| Sang songs      | 2.29 *  | 1.09 - 4.83  | 0.08                  |
| Took outside    | 1.49    | 0.76 – 2.90  | 0.05                  |
| Actively played | 2.83    | 0.86 - 9.21  | 0.12                  |
| Named/counted   | 2.05*   | 1.24 - 3.71  | 0.07                  |

Notes: \* $p < 0.05$ . Adjusted multivariable regression included child sex and age, as well as caregiver education, socioeconomic status, and fixed effects for research staff members conducting the assessment. “Adj. OR” stands for “Adjusted Odds Ratio” and “95% CI” stands for “95% Confidence Interval of the Adjusted Odds Ratio”.

## Figure 1. Study Flow Diagram

**Notes:** The control group comprised caregiver-infant dyads in which infants were 7-11 months-old in May-July 2017, the recruitment period. Caregiver-infant dyads in the control group were assessed immediately upon study enrolment only. The intervention group comprised caregiver-infant dyads in which infants were 0-2 months in May-July 2017. Caregiver-infant dyads in the intervention group were assessed three times (baseline, midterm, final assessment), with baseline assessment conducted immediately upon study enrollment and final assessment conducted an average of eight months later, when infants were 7-11 months-old.

For peer review only



### ***Contributorship statement***

All authors reviewed manuscript drafts and consented to the final submitted version.

**Melino Ndayiziye** is the Principal Investigator for this study. He is responsible for writing the grant, securing funding, representing the study at international conferences, and interfacing with the ethics committee and US-based investigators. He oversaw on-site study activities and managed Lesotho site staff.

**McBain, Ryan K.** is the US-based study lead who joined in the analysis phase. He was in charge of coordinating co-investigators, supervising data analysis, and co-writing the manuscript.

**Collin Whelley** conducted all data management and analysis with the help of AM.

**Rorisang Lerotholi**, the study coordinator, reviewed translated assessment and intervention materials, translated during village health worker trainings, consulted on adaptations, conducted fidelity checks on interventions, and collected data for analysis.

**Joalane Mabathoana**, the then Maternal and Child Health Program Manager at Partners In Health, Lesotho managed the study coordinator and participated in adaptation of materials and training of village health workers.

**Carmona, Merida**, was in charge of donor compliance and study design.

**Curtain, Joe** developed the study design with Ms. Carmona.

**Birru, Ermyas** developed data collection instruments, consulted on data components of the study design, analysis and review of the manuscript.

**Sara Stulac** is a pediatrician and co-investigator on this grant with experience working in Lesotho. She delivered expertise in the field of early child development and pediatrics.

**Ann C. Miller** is the epidemiologist responsible for data analysis for the CASITA project. She provided analytical for this study guidance to CW, specifically for the EASQ, including coding for score standardization.

**Sonya S. Shin** is the senior researcher for the CASITA project and provided high level mentorship to AKN in the adaptation of the study intervention and training of village health workers.

**Nancy Rumaldo** is the site leader of the CASITA project and provided field-level consultation during the adaptation and training in Lesotho.

**Mukherjee, Joia** was the senior clinician in charge of overseeing the clinical components of the study.

**Adrienne Katrina Nelson**, Principal Investigator of the pilot CASITA study, facilitated intervention and measurement tool translation and adaptation for this study. She traveled to

1  
2  
3 Lesotho to train MJ, the study coordinator, and the village health workers in the intervention.  
4 She co-wrote the manuscript and was in charge of submission and correspondence.  
5  
6  
7

### 8 ***Competing interests***

9  
10 Authors report no competing interests.  
11

### 12 ***Funding***

13  
14 This study was funded by Grand Challenges Canada's Saving Brains grant # SB-1707-09146.  
15  
16

### 17 ***Data sharing statement***

18  
19 Extra data is available by emailing Collin Whelley at [collinwhelley@gmail.com](mailto:collinwhelley@gmail.com)  
20  
21

### 22 ***Ethics statement***

23  
24 The study was reviewed and approved by the Lesotho National Ethics Committee approval  
25  
26 reference #ID51-2017.  
27  
28  
29  
30  
31  
32  
33  
34  
35  
36  
37  
38  
39  
40  
41  
42  
43  
44  
45  
46  
47  
48  
49  
50  
51  
52  
53  
54  
55  
56  
57  
58  
59  
60

## References

1. Paterson Sea: **Brain matter matters: Should we intervene well before preschool?** In. Washington DC: Brookings Institution; 2017.
2. Duncan GJ, Brooks-Gunn, J. and Klebanov, P. K.: **Economic Deprivation and Early Childhood Development.** *Child Development* 1994, **65**(2):296–318.
3. Onis MdaB, F.: **Childhood stunting: a global perspective.** *Maternal & Child Nutrition* 2016, **12**:12–26.
4. Black MM, Walker, S.P., Fernald, L.C.H., Andersen, C.T., DiGirolamo, A.M., Lu, C., McCoy, D.C., Fink, G., Shawar, Y.R., Shiffman, J., Devercelli, A.E., Wodon, Q.T., Vargas-Barón, E., Grantham-McGregor, S., Lancet Early Childhood Development Series Steering Committee: **Early childhood development coming of age: science through the life course.** *Lancet* 2017, **389**(10064):77-90.
5. Blair C, Raver, C.C., Granger, D., Mills-Koonce, R., Hibel, L., Family Life Project Key Investigators: **Allostasis and allostatic load in the context of poverty in early childhood.** *Dev Psychopathol* 2011, **23**(3):845-857.
6. Park C, Rosenblat, J.D., Brietzke, E., Pan, Z., Lee, Y., Cao, B., Zuckerman, H., Kalantarova, A., McIntyre, R.S.: **Stress, epigenetics and depression: A systematic review.** *Neuroscience and Biobehavioral Reviews* 2019, **102**:139-152.
7. El-Kogali SETaK, C. G.: **Expanding opportunities for the next generation : early childhood development in the Middle East and North Africa.** In.: The World Bank; 2015.
8. Victora CGea: **Maternal and child undernutrition: consequences for adult health and human capital.** *The Lancet* 2008, **371**(9609):340–357.
9. Hamadani JD MS, Tofail F, Hasan MI, Huda SN, Baker-Henningham H, Ridout D, Grantham-McGregor S.: **Integrating an early childhood development programme into Bangladeshi primary health-care services: an open-label, cluster-randomised controlled trial.** *Lancet Global Health* 2019, **7**(3).
10. Gladstone M PJ, Thindwa R, Chitimbe F, Chidzalo K, Chandna J, Gleadow Ware S, Maleta K: **Care for Child Development in rural Malawi: a model feasibility and pilot study.** *Ann N Y Acad Sci* 2018, **1419**(1):102-119.
11. Nelson AK MA, Munoz M, et al: **CASITA: a controlled pilot study of community-based family coaching to stimulate early child development in Lima, Peru.** *BMJ Paediatrics Open* 2018.
12. Chang SMea: **Integrating a Parenting Intervention With Routine Primary Health Care: A Cluster Randomized Trial.** *Pediatrics* 2015, **136**:272–280.
13. Brinkman SA, Hasan, A., Jung, H., Kinnell, A. Pradhan, M.: **The Impact of Expanding Access to Early Childhood Education Services in Rural Indonesia.** *Journal of Labor Economics* 2017, **35**(S1).
14. Black MM, Dewey, K.G.: **Promoting equity through integrated early child development and nutrition interventions.** *Annals Of The New York Academy Of Sciences* 2014, **1308**(Integrating Nutrition and Early Childhood Development Interventions):1-10.
15. De Wolff MSavI, M. H.: **Sensitivity and attachment: a meta-analysis on parental antecedents of infant attachment.** *Child Development* 1997, **68**(4):571-591.
16. Kochanska Gea: **Pathways to conscience: early mother-child mutually responsive orientation and children’s moral emotion, conduct, and cognition.** *Journal of Child Psychology and Psychiatry* 2005, **46**(1):19-34.

17. **Parenting Matters: Supporting Parents of Children Ages 0-8.** In. Washington DC: National Academies of Sciences; 2016.
18. Morelli G BK, Chaudhary N, Gottlieb A, Keller H, Murray M, Quinn N, Rosabal-Coto M, Scheidecker G, Takada A, Vicedo M: **Bringing the Real World Into Developmental Science: A Commentary on Weber, Fernald, and Diop (2017).** *Child Dev* 2018, **89**(6):e594-e603.
19. Petrovic OaY, A.: **Promoting Care for Child Development in Community Health Services.** In. New York, NY: UNICEF; 2013.
20. Miller AC, Rumaldo, N., Soplapuco, G., Condeso, A., Kammerer, B., Lundy, S., Faiffer, F., Montañez, A., Ramos, K., Rojas, N., Contreras, C., Muñoz, M., Valdivia, H., Vilca, D., Córdova, N., Hilario, P., Vibbert, M., Lecca, L., Shin, S.: **Success at Scale: Outcomes of Community-based Neurodevelopment Intervention (CASITA) for Children 6-20 months with Risk of Delay in Lima, Peru.** *Child Dev* 2021.
21. Bricker D SJ: **Ages and stages questionnaires: a parent completed, child monitoring system.** In. Edited by Brookes P, vol. 2nd edn. Baltimore, MD; 1999.
22. Lia C, Fernald, H., Kariger, P., Hidrobo, M., Gertler, P.J.: **Development gradients in low-income countries.** In: *Proceedings of the National Academy of Sciences.* vol. 109: National Academy of Sciences; 2012: 17273-17280.
23. Hsiao C, Richter, L., Makusha, T., Matafwali, B., van Heerden, A., Mabaso, M.: **Use of the ages and stages questionnaire adapted for South Africa and Zambia.** *Child Care Health Dev* 2017, **43**(1):59-66.
24. Shaklee HaD, D.: **Survey of Parenting Practice: Tool Kit.** In. Edited by Idaho Uo. Moscow, Idaho; 2006.
25. **Multiple Indicator Cluster Survey.** In.: UNICEF; 2020.
26. Kroenke K SR, Williams JB: **The PHQ-9: validity of a brief depression severity measure.** *J Gen Intern Med* 2001, **16**(9):606-613.
27. Cates CB, Weisleder, A. and Mendelsohn, A. L.: **Mitigating the Effects of Family Poverty on Early Child Development through Parenting Interventions in Primary Care.** *Academic Pediatrics* 2016, **16**:S112-120.
28. Shah Rea: **Primary Care-Based Interventions to Promote Positive Parenting Behaviors: A Meta-analysis.** *Pediatrics* 2016, **137**(5).
29. Peacock-Chambers E, Ivy, K., Bair-Merritt, M.: **Primary Care Interventions for Early Childhood Development: A Systematic Review.** *Pediatrics* 2017(140).
30. About FEaY, A. K.: **Reproductive, Maternal, Newborn, and Child Health: Disease Control Priorities,** vol. 2, 3rd edn. Washington D.C.: The International Bank for Reconstruction and Development / The World Bank; 2016.
31. Tomlinson M SS, Marlow M, Cluver L, Cooper P, Murray L, Mofokeng S, Morley N, Makhetha M, Gordon S, Esterhuizen T, Sherr L: **Improving early childhood care and development, HIV-testing, treatment and support, and nutrition in Mokhotlong, Lesotho: study protocol for a cluster randomized controlled trial.** *Trials* 2016, **17**(1):538.
32. Singla DR, Kumbakumba, E., Aboud, F. E.: **Effects of a parenting intervention to address maternal psychological wellbeing and child development and growth in rural Uganda: a community-based, cluster randomised trial.** *The Lancet Global Health* 2015, **3**(8):e458–e469.
33. Rayce SBea: **Effects of parenting interventions for at-risk parents with infants: a systematic review and meta-analyses.** *BMJ Open* 2017, **7**(12).
34. Schieber GJ: **Financing Global Health: Mission Unaccomplished.** *Health Affairs* 2007, **26**(4):921-934.

- 1  
2  
3 35. Dieleman Jea: **Evolution and patterns of global health financing 1995–2014: development assistance for health, and government, prepaid private, and out-of-pocket health spending in 184 countries.** *The Lancet* 2017, **389**:1981–2004.
- 4  
5  
6 36. Dua Tea: **Global research priorities to accelerate early child development in the sustainable development era.** *The Lancet Global Health* 2016, **4**(12):e887-e889.
- 7  
8 37. Clark Hea: **A future for the world’s children? A WHO–UNICEF–Lancet Commission.** *The Lancet* 2020, **395**:605-658.
- 9  
10  
11 38. Mechael Pea: **Barriers and gaps affecting mHealth in low and middle-income countries: policy white paper.** In. New York, NY: Columbia University; 2010.
- 12  
13 39. Frehywot Sea: **E-learning in medical education in resource constrained low- and middle-income countries.** *Human Resources for Health* 2013, **11**(1).
- 14  
15  
16  
17  
18  
19  
20  
21  
22  
23  
24  
25  
26  
27  
28  
29  
30  
31  
32  
33  
34  
35  
36  
37  
38  
39  
40  
41  
42  
43  
44  
45  
46  
47  
48  
49  
50  
51  
52  
53  
54  
55  
56  
57  
58  
59  
60

For peer review only

Figure 1. Study Flow Diagram

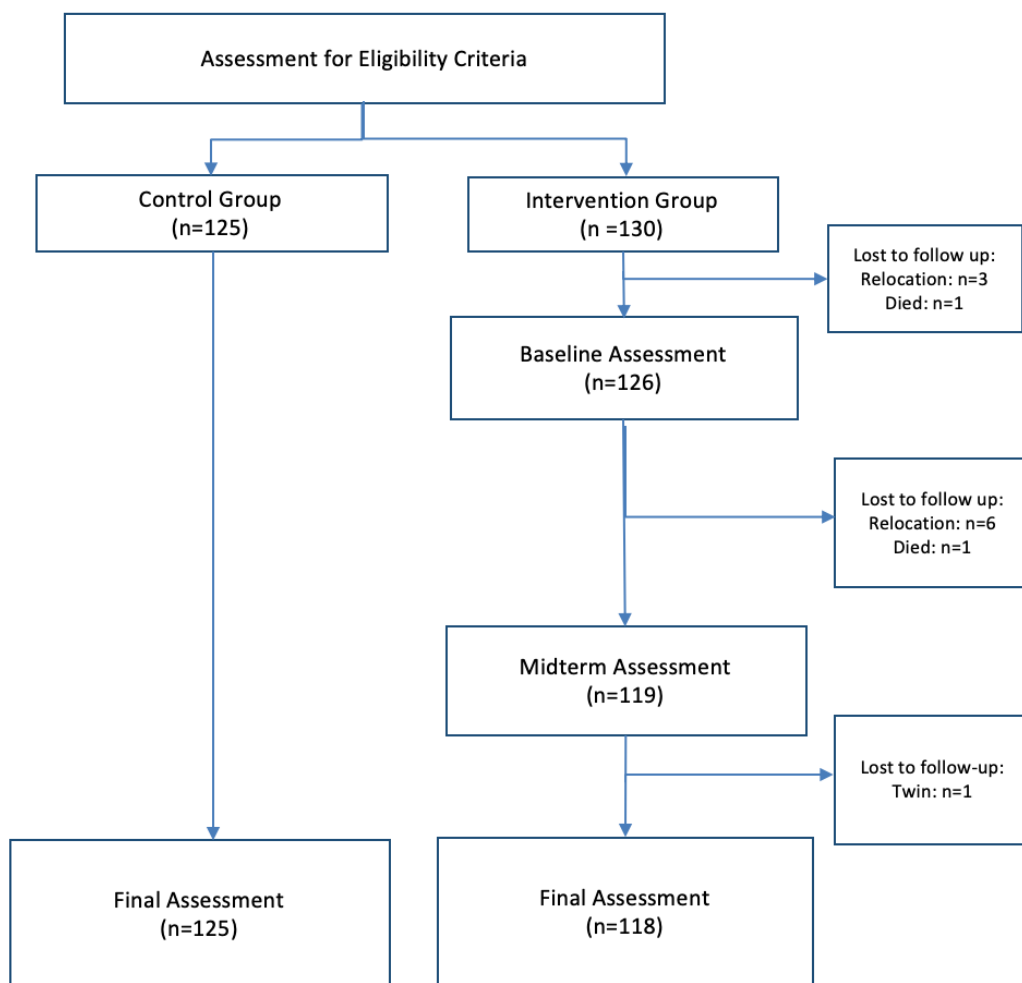

**Notes:** The control group comprised caregiver-infant dyads in which infants were 7-11 months-old in May-July 2017, the recruitment period. Caregiver-infant dyads in the control group were assessed immediately upon study enrolment only. The intervention group comprised caregiver-infant dyads in which infants were 0-2 months in May-July 2017. Caregiver-infant dyads in the intervention group were assessed three times (baseline, midterm, final assessment), with baseline assessment conducted immediately upon study enrollment and final assessment conducted seven months later, when infants were 7-11 months-old.

1  
2  
3  
4  
5  
6  
7  
8  
9  
10  
11  
12  
13  
14  
15  
16  
17  
18  
19  
20  
21  
22  
23  
24  
25  
26  
27  
28  
29  
30  
31  
32  
33  
34  
35  
36  
37  
38  
39  
40  
41  
42  
43  
44  
45  
46  
47  
48  
49  
50  
51  
52  
53  
54  
55  
56  
57  
58  
59  
60STROBE Statement—Checklist of items that should be included in reports of *case-control studies*

|                              | Item No | Recommendation                                                                                                                                                                                    | Page No |
|------------------------------|---------|---------------------------------------------------------------------------------------------------------------------------------------------------------------------------------------------------|---------|
| <b>Title and abstract</b>    | 1       | (a) Indicate the study's design with a commonly used term in the title or the abstract                                                                                                            | 1       |
|                              |         | (b) Provide in the abstract an informative and balanced summary of what was done and what was found                                                                                               | 1       |
| <b>Introduction</b>          |         |                                                                                                                                                                                                   |         |
| Background/rationale         | 2       | Explain the scientific background and rationale for the investigation being reported                                                                                                              | 5-6     |
| Objectives                   | 3       | State specific objectives, including any prespecified hypotheses                                                                                                                                  | 6       |
| <b>Methods</b>               |         |                                                                                                                                                                                                   |         |
| Study design                 | 4       | Present key elements of study design early in the paper                                                                                                                                           | 6       |
| Setting                      | 5       | Describe the setting, locations, and relevant dates, including periods of recruitment, exposure, follow-up, and data collection                                                                   | 7-8     |
| Participants                 | 6       | (a) Give the eligibility criteria, and the sources and methods of case ascertainment and control selection. Give the rationale for the choice of cases and controls                               | 9       |
|                              |         | (b) For matched studies, give matching criteria and the number of controls per case                                                                                                               | N/A     |
| Variables                    | 7       | Clearly define all outcomes, exposures, predictors, potential confounders, and effect modifiers. Give diagnostic criteria, if applicable                                                          | 11-12   |
| Data sources/<br>measurement | 8*      | For each variable of interest, give sources of data and details of methods of assessment (measurement). Describe comparability of assessment methods if there is more than one group              | 11-12   |
| Bias                         | 9       | Describe any efforts to address potential sources of bias                                                                                                                                         | 13      |
| Study size                   | 10      | Explain how the study size was arrived at                                                                                                                                                         | 13      |
| Quantitative variables       | 11      | Explain how quantitative variables were handled in the analyses. If applicable, describe which groupings were chosen and why                                                                      | 11-12   |
| Statistical methods          | 12      | (a) Describe all statistical methods, including those used to control for confounding                                                                                                             | 13      |
|                              |         | (b) Describe any methods used to examine subgroups and interactions                                                                                                                               | N/A     |
|                              |         | (c) Explain how missing data were addressed                                                                                                                                                       | 13      |
|                              |         | (d) If applicable, explain how matching of cases and controls was addressed                                                                                                                       | N/A     |
|                              |         | (e) Describe any sensitivity analyses                                                                                                                                                             | N/A     |
| <b>Results</b>               |         |                                                                                                                                                                                                   |         |
| Participants                 | 13*     | (a) Report numbers of individuals at each stage of study—eg numbers potentially eligible, examined for eligibility, confirmed eligible, included in the study, completing follow-up, and analysed | 10      |
|                              |         | (b) Give reasons for non-participation at each stage                                                                                                                                              | 10      |
|                              |         | (c) Consider use of a flow diagram                                                                                                                                                                | 22      |
| Descriptive data             | 14*     | (a) Give characteristics of study participants (eg demographic, clinical, social) and information on exposures and potential confounders                                                          | 19      |
|                              |         | (b) Indicate number of participants with missing data for each variable of interest                                                                                                               | 14      |
| Outcome data                 | 15*     | Report numbers in each exposure category, or summary measures of exposure                                                                                                                         | 14      |



|    |                          |    |                                                                                                                                                                                                              |
|----|--------------------------|----|--------------------------------------------------------------------------------------------------------------------------------------------------------------------------------------------------------------|
| 1  |                          |    |                                                                                                                                                                                                              |
| 2  |                          |    |                                                                                                                                                                                                              |
| 3  |                          |    |                                                                                                                                                                                                              |
| 4  | Main results             | 16 | (a) Give unadjusted estimates and, if applicable, confounder-adjusted estimates and their precision (eg, 95% confidence interval). Make clear which confounders were adjusted for and why they were included |
| 5  |                          |    |                                                                                                                                                                                                              |
| 6  |                          |    |                                                                                                                                                                                                              |
| 7  |                          |    |                                                                                                                                                                                                              |
| 8  |                          |    |                                                                                                                                                                                                              |
| 9  |                          |    |                                                                                                                                                                                                              |
| 10 |                          |    |                                                                                                                                                                                                              |
| 11 |                          |    |                                                                                                                                                                                                              |
| 12 | Other analyses           | 17 | Report other analyses done—eg analyses of subgroups and interactions, and sensitivity analyses                                                                                                               |
| 13 |                          |    |                                                                                                                                                                                                              |
| 14 |                          |    |                                                                                                                                                                                                              |
| 15 | <b>Discussion</b>        |    |                                                                                                                                                                                                              |
| 16 | Key results              | 18 | Summarise key results with reference to study objectives                                                                                                                                                     |
| 17 |                          |    |                                                                                                                                                                                                              |
| 18 | Limitations              | 19 | Discuss limitations of the study, taking into account sources of potential bias or imprecision. Discuss both direction and magnitude of any potential bias                                                   |
| 19 |                          |    |                                                                                                                                                                                                              |
| 20 | Interpretation           | 20 | Give a cautious overall interpretation of results considering objectives, limitations, multiplicity of analyses, results from similar studies, and other relevant evidence                                   |
| 21 |                          |    |                                                                                                                                                                                                              |
| 22 |                          |    |                                                                                                                                                                                                              |
| 23 | Generalisability         | 21 | Discuss the generalisability (external validity) of the study results                                                                                                                                        |
| 24 |                          |    |                                                                                                                                                                                                              |
| 25 | <b>Other information</b> |    |                                                                                                                                                                                                              |
| 26 | Funding                  | 22 | Give the source of funding and the role of the funders for the present study and, if applicable, for the original study on which the present article is based                                                |
| 27 |                          |    |                                                                                                                                                                                                              |
| 28 |                          |    |                                                                                                                                                                                                              |
| 29 |                          |    |                                                                                                                                                                                                              |
| 30 |                          |    |                                                                                                                                                                                                              |
| 31 |                          |    |                                                                                                                                                                                                              |
| 32 |                          |    |                                                                                                                                                                                                              |
| 33 |                          |    |                                                                                                                                                                                                              |
| 34 |                          |    |                                                                                                                                                                                                              |
| 35 |                          |    |                                                                                                                                                                                                              |
| 36 |                          |    |                                                                                                                                                                                                              |
| 37 |                          |    |                                                                                                                                                                                                              |
| 38 |                          |    |                                                                                                                                                                                                              |
| 39 |                          |    |                                                                                                                                                                                                              |
| 40 |                          |    |                                                                                                                                                                                                              |
| 41 |                          |    |                                                                                                                                                                                                              |
| 42 |                          |    |                                                                                                                                                                                                              |
| 43 |                          |    |                                                                                                                                                                                                              |
| 44 |                          |    |                                                                                                                                                                                                              |
| 45 |                          |    |                                                                                                                                                                                                              |
| 46 |                          |    |                                                                                                                                                                                                              |
| 47 |                          |    |                                                                                                                                                                                                              |
| 48 |                          |    |                                                                                                                                                                                                              |
| 49 |                          |    |                                                                                                                                                                                                              |
| 50 |                          |    |                                                                                                                                                                                                              |
| 51 |                          |    |                                                                                                                                                                                                              |
| 52 |                          |    |                                                                                                                                                                                                              |
| 53 |                          |    |                                                                                                                                                                                                              |
| 54 |                          |    |                                                                                                                                                                                                              |
| 55 |                          |    |                                                                                                                                                                                                              |
| 56 |                          |    |                                                                                                                                                                                                              |
| 57 |                          |    |                                                                                                                                                                                                              |
| 58 |                          |    |                                                                                                                                                                                                              |
| 59 |                          |    |                                                                                                                                                                                                              |
| 60 |                          |    |                                                                                                                                                                                                              |

\*Give information separately for cases and controls.

**Note:** An Explanation and Elaboration article discusses each checklist item and gives methodological background and published examples of transparent reporting. The STROBE checklist is best used in conjunction with this article (freely available on the Web sites of PLoS Medicine at <http://www.plosmedicine.org/>, Annals of Internal Medicine at <http://www.annals.org/>, and Epidemiology at <http://www.epidem.com/>). Information on the STROBE Initiative is available at <http://www.strobe-statement.org>.
